1 **Integrative proteomics and bioinformatic prediction enable a high-confidence apicoplast**  
2 **proteome in malaria parasites**

3

4 Michael J. Boucher<sup>1,2</sup>, Sreejoyee Ghosh<sup>2</sup>, Lichao Zhang<sup>3</sup>, Avantika Lal<sup>4,10</sup>, Se Won Jang<sup>5,10</sup>, An  
5 Ju<sup>6,11</sup>, Shuying Zhang<sup>6,11</sup>, Xinzi Wang<sup>6,11</sup>, Stuart A. Ralph<sup>7</sup>, James Zou<sup>8,9</sup>, Joshua E. Elias<sup>3</sup>, and  
6 Ellen Yeh<sup>1,2,4,9\*</sup>

7

8 <sup>1</sup>Department of Microbiology and Immunology, Stanford University School of Medicine,  
9 Stanford, CA 94305, United States of America

10 <sup>2</sup>Department of Biochemistry, Stanford University School of Medicine, Stanford, CA 94305,  
11 United States of America

12 <sup>3</sup>Department of Chemical and Systems Biology, Stanford University School of Medicine,  
13 Stanford, CA 94305, United States of America

14 <sup>4</sup>Department of Pathology, Stanford University School of Medicine, Stanford, CA 94305, United  
15 States of America

16 <sup>5</sup>Department of Computer Science, Stanford University, Stanford, CA 94305, United States of  
17 America

18 <sup>6</sup>Department of Bioengineering, Stanford University, Stanford, CA 94305, United States of  
19 America

20 <sup>7</sup>Department of Biochemistry and Molecular Biology, Bio21 Molecular Science and  
21 Biotechnology Institute, The University of Melbourne, Parkville, Vic 3010, Australia

22 <sup>8</sup>Department of Biomedical Data Science, Stanford University School of Medicine, Stanford, CA

23 94305, United States of America<sup>9</sup>Chan Zuckerberg Biohub, San Francisco, CA 94158, United

24 States of America

25 <sup>10</sup>These authors contributed equally

26 <sup>11</sup>These authors contributed equally

27 \*Correspondence: [ellenyeh@stanford.edu](mailto:ellenyeh@stanford.edu)

28 Keywords: malaria, apicoplast, BioID, proteome, neural network

29

## 30 **Abstract**

31 Malaria parasites (*Plasmodium* spp.) and related apicomplexan pathogens contain a non-  
32 photosynthetic plastid called the apicoplast. Derived from an unusual secondary eukaryote-  
33 eukaryote endosymbiosis, the apicoplast is a fascinating organelle whose function and biogenesis  
34 rely on a complex amalgamation of bacterial and algal pathways. Because these pathways are  
35 distinct from the human host, the apicoplast is an excellent source of novel antimalarial targets.  
36 Despite its biomedical importance and evolutionary significance, the absence of a reliable  
37 apicoplast proteome has limited most studies to the handful of pathways identified by homology  
38 to bacteria or primary chloroplasts, precluding our ability to study the most novel apicoplast  
39 pathways. Here we combine proximity biotinylation-based proteomics (BioID) and a new  
40 machine learning algorithm to generate a high-confidence apicoplast proteome consisting of 346  
41 proteins. Critically, the high accuracy of this proteome significantly outperforms previous  
42 prediction-based methods and extends beyond other BioID studies of unique parasite  
43 compartments. Half of identified proteins have unknown function, and 77% are predicted to be  
44 important for normal blood-stage growth. We validate the apicoplast localization of a subset of  
45 novel proteins and show that an ATP-binding cassette protein ABCF1 is essential for blood-stage  
46 survival and plays a previously unknown role in apicoplast biogenesis. These findings indicate  
47 critical organellar functions for newly discovered apicoplast proteins. The apicoplast proteome  
48 will be an important resource for elucidating unique pathways derived from secondary  
49 endosymbiosis and prioritizing antimalarial drug targets.

50

## 51 **Introduction**

52 Identification of new antimalarial drug targets is urgently needed to address emerging  
53 resistance to all currently available therapies. However, nearly half of the *Plasmodium*  
54 *falciparum* genome encodes conserved proteins of unknown function [1], obscuring critical  
55 pathways required for malaria pathogenesis. The apicoplast is an essential, non-photosynthetic  
56 plastid found in *Plasmodium* spp. and related apicomplexan pathogens [2, 3]. This unusual  
57 organelle is an enriched source of both novel cellular pathways and parasite-specific drug targets  
58 [4]. It was acquired by secondary (i.e., eukaryote-eukaryote) endosymbiosis and has  
59 evolutionarily diverged from the primary endosymbiotic organelles found in model organisms.  
60 While some aspects of apicoplast biology are shared with bacteria, mitochondria, and primary  
61 chloroplasts, many are unique to the secondary plastid in this parasite lineage. For example,  
62 novel translocons import apicoplast proteins through specialized membranes derived from  
63 secondary endosymbiosis [5-8], while the parasite's pared-down metabolism necessitates export  
64 of key metabolites from the apicoplast using as-yet unidentified small molecule transporters [9,  
65 10].

66 These novel cellular pathways, which are also distinct from human host cells, can be  
67 exploited for antimalarial drug discovery. Indeed, antimalarials that target apicoplast pathways  
68 are currently in use as prophylactics or partner drugs (doxycycline, clindamycin) or have been  
69 tested in clinical trials (fosmidomycin) [11-15]. However, known apicoplast drug targets have  
70 been limited to the handful of pathways identified by homology to plastid-localized pathways in  
71 model organisms. Meanwhile the number of druggable apicoplast targets, including those in  
72 unique secondary plastid pathways, is likely more extensive [16].

73 A major hurdle to identifying novel, parasite-specific pathways and prioritizing new  
74 apicoplast targets is the lack of a well-defined organellar proteome. So far, the apicoplast has not

75 been isolated in sufficient yield or purity for traditional organellar proteomics. Instead, large-  
76 scale, unbiased identification of apicoplast proteins has relied on bioinformatic prediction of  
77 apicoplast targeting sequences [17-19]. These prediction algorithms identify hundreds of putative  
78 apicoplast proteins but contain numerous false positives. Confirmation of these low-confidence  
79 candidate apicoplast proteins is slow due to the genetic intractability of *P. falciparum* parasites.  
80 Unbiased identification of apicoplast proteins in an accurate and high-throughput manner would  
81 significantly enhance our ability to study novel apicoplast pathways and validate new  
82 antimalarial drug targets.

83 BioID and other cellular proximity labeling methods are attractive techniques for  
84 identification of organellar proteins [20, 21]. In BioID, a promiscuous biotin ligase, BirA\*, is  
85 fused to a bait protein and catalyzes biotinylation of neighbor proteins in intact cells. Proximity  
86 labeling methods have been used for unbiased proteomic profiling of subcellular compartments  
87 in diverse parasitic protozoa, including *Plasmodium* spp. [22-29]. Here we used BioID to  
88 perform large-scale identification of *P. falciparum* apicoplast proteins during asexual blood-  
89 stage growth. Extending beyond previous BioID studies of unique parasite compartments, we  
90 achieved high positive predictive value of true apicoplast proteins by implementing an  
91 endoplasmic reticulum (ER) negative control to remove frequent contaminants expected based  
92 on the trafficking route of apicoplast proteins. Furthermore, higher coverage was achieved by  
93 using the proteomic dataset to develop an improved neural network prediction algorithm,  
94 PlastNN. We now report a high-confidence apicoplast proteome of 346 proteins rich in novel and  
95 essential functions.

96

97 **Results**

98 **The promiscuous biotin ligase BirA\* is functional in the *P. falciparum* apicoplast and**  
99 **endoplasmic reticulum**

100 To target the promiscuous biotin ligase BirA\* to the apicoplast, the *N*-terminus of a GFP-  
101 BirA\* fusion protein was modified with the apicoplast-targeting leader sequence from acyl  
102 carrier protein (ACP) (Fig 1A). Since apicoplast proteins transit the parasite ER en route to the  
103 apicoplast [30], we also generated a negative control in which GFP-BirA\* was targeted to the ER  
104 via an *N*-terminal signal peptide and a *C*-terminal ER-retention motif (Fig 1A). Each of these  
105 constructs was integrated into an ectopic locus in Dd2<sup>attB</sup> parasites [31] to generate BioID-Ap  
106 and BioID-ER parasites (S1A Fig). Immunofluorescence co-localization and live imaging of  
107 these parasites confirmed GFP-BirA\* localization to either the apicoplast or the ER, respectively  
108 (Fig 1B and S1B Fig).

109 To test the functionality of the GFP-BirA\* fusions in the apicoplast and ER, we labeled  
110 either untransfected Dd2<sup>attB</sup>, BioID-Ap, or BioID-ER parasites with DMSO or 50  $\mu$ M biotin and  
111 assessed biotinylation by western blotting and fixed-cell fluorescent imaging. As has been  
112 reported [28], significant labeling of GFP-BirA\*-expressing parasites above background was  
113 achieved even in the absence of biotin supplementation, suggesting that the 0.8  $\mu$ M biotin in  
114 RPMI growth medium is sufficient for labeling (Fig 1C). Addition of 50  $\mu$ M biotin further  
115 increased protein biotinylation. Fluorescence imaging of biotinylated proteins revealed staining  
116 that co-localized with the respective apicoplast- or ER-targeted GFP-BirA\* fusion proteins (Fig  
117 1D). These results confirm that GFP-BirA\* fusions are active in the *P. falciparum* apicoplast and  
118 ER and can be used for compartment-specific biotinylation of proteins.

119

120 **Proximity-dependent labeling (BioID) generates an improved apicoplast proteome dataset**

121 For large-scale identification of apicoplast proteins, biotinylated proteins from late-stage  
122 BioID-Ap and BioID-ER parasites were purified using streptavidin-conjugated beads and  
123 identified by mass spectrometry. A total of 728 unique *P. falciparum* proteins were detected in  
124 the apicoplast and/or ER based on presence in at least 2 of 4 biological replicates and at least 2  
125 unique spectral matches in any single mass spectrometry run (Fig 2A and S1 Table). The  
126 abundance of each protein in apicoplast and ER samples was calculated by summing the total  
127 MS1 area of all matched peptides and normalizing to the total MS1 area of all detected *P.*  
128 *falciparum* peptides within each mass spectrometry run.

129 To assess the ability of our dataset to distinguish between true positives and negatives,  
130 we generated control lists of 96 known apicoplast and 451 signal peptide-containing non-  
131 apicoplast proteins based on published localizations and pathways (S2 Table). Consistent with an  
132 enrichment of apicoplast proteins in BioID-Ap samples, we observed a clear separation of known  
133 apicoplast and non-apicoplast proteins based on apicoplast:ER abundance ratio (Fig 2A). Using  
134 receiver operating characteristic (ROC) curve analysis (Fig 2B), we set a threshold of  
135 apicoplast:ER abundance ratio  $\geq 5$ -fold for inclusion of 187 proteins in the BioID apicoplast  
136 proteome, which maximized sensitivity while minimizing false positives (Fig 2A, dotted line; S1  
137 Table). This dataset included 50 of the 96 positive control proteins for a sensitivity of 52% (95%  
138 CI: 42-62%). None of the original 451 negative controls were present above the  $\geq 5$ -fold  
139 enrichment threshold, but manual inspection of this list identified 5 likely false positives not  
140 present on our initial list (S1 Table) for a positive predictive value (PPV; the estimated fraction  
141 of proteins on the list that are true positives) of 91% (95% CI: 80-96%).

142 To benchmark our dataset against the current standard for large-scale identification of  
143 apicoplast proteins, we compared the apicoplast BioID proteome to the predicted apicoplast

144 proteomes from three published bioinformatic algorithms: PATS [17], PlasmoAP [18], and  
145 ApicoAP [19] (S3 Table). At 52% sensitivity, apicoplast BioID identified fewer known  
146 apicoplast proteins than PATS or PlasmoAP, which had sensitivities of 89% and 84%,  
147 respectively, but outperformed the 40% sensitivity of ApicoAP (Fig 2C). All three algorithms as  
148 well as apicoplast BioID achieved high negative predictive values (NPV), since NPV is  
149 influenced by the larger number of true negatives (known non-apicoplast proteins) than true  
150 positives (known apicoplast) from literature data (S2A Fig). We expected that the advantages of  
151 apicoplast BioID would be its improved discrimination between true and false positives (Fig 2A)  
152 and the ability to detect proteins without classical targeting presequences. Indeed, bioinformatic  
153 algorithms had poor PPVs ranging from 19-36% compared to the 91% PPV of BioID (Fig 2D).  
154 Even a dataset consisting only of proteins predicted by all three algorithms achieved a PPV of  
155 just 25%. Similarly, the specificity of BioID outperformed that of the bioinformatic algorithms  
156 (S2B Fig). Consistent with the low PPVs of the bioinformatic algorithms, many proteins  
157 predicted by these algorithms are not enriched in BioID-Ap samples and are likely to be false  
158 positives (S3 Fig). Altogether, identification of apicoplast proteins using BioID provided a  
159 dramatic improvement in prediction performance over bioinformatic algorithms.

160

### 161 **Apicoplast BioID identifies proteins of diverse functions in multiple subcompartments**

162 To determine whether lumenally targeted GFP-BirA\* exhibited any labeling preferences,  
163 we assessed proteins identified based on the presence of transmembrane domains, their sub-  
164 organellar localization, and their functions. First, we determined the proportion of the 187  
165 proteins identified by apicoplast BioID that are membrane proteins. To ensure that proteins were  
166 not classified as membrane proteins solely due to misclassification of a signal peptide as a



167 transmembrane domain, we considered a protein to be in a membrane only if it contained at least  
168 one predicted transmembrane domain more than 80 amino acids from the protein's *N*-terminus  
169 (as determined by annotation in PlasmoDB). These criteria suggested that 11% of identified  
170 proteins (20/187) were likely membrane proteins (Fig 3A), indicating that luminal GFP-BirA\*  
171 can label apicoplast membrane proteins.

172         Second, apicoplast proteins may localize to one or multiple sub-compartments defined by  
173 the four apicoplast membranes. It was unclear whether BirA\* targeted to the lumen would label  
174 proteins in non-luminal compartments. Based on literature descriptions, we classified the 96  
175 known apicoplast proteins on our positive control list as either luminal (present in luminal space  
176 or on the innermost apicoplast membrane) or non-luminal (all other sub-compartments) and  
177 determined the proportion that were identified in our dataset. Apicoplast BioID identified 56%  
178 (45/81) of the classified luminal proteins and 33% (5/15) of the non-luminal proteins (Fig 3B),  
179 suggesting that the GFP-BirA\* bait used can label both luminal and non-luminal proteins but  
180 may have a preference for luminal proteins (though this difference did not reach statistical  
181 significance).

182         Finally, we characterized the functions of proteins identified by apicoplast BioID. We  
183 grouped positive control apicoplast proteins into functional categories and assessed the  
184 proportion of proteins identified from each functional group (Fig 3C). BioID identified a  
185 substantial proportion (67-100%) of proteins in four apicoplast pathways that are essential in  
186 blood stage and localize to the apicoplast lumen, specifically DNA replication, protein  
187 translation, isoprenoid biosynthesis, and iron-sulfur cluster biosynthesis. Conversely, BioID  
188 identified few proteins involved in heme or fatty acid biosynthesis (0% and 17%, respectively),  
189 which are luminal pathways that are non-essential in the blood-stage and which are likely to be

190 more abundant in other life cycle stages [32-36]. We achieved moderate coverage of proteins  
191 involved in protein quality control (44%) and redox regulation (38%). Consistent with the  
192 reduced labeling of non-luminal apicoplast proteins, only a small subset (29%) of proteins  
193 involved in import of nuclear-encoded apicoplast proteins were identified. Overall, apicoplast  
194 BioID identified soluble and membrane proteins of diverse functions in multiple apicoplast  
195 compartments with higher coverage for luminal proteins required during blood-stage infection.

196

### 197 **The PlastNN algorithm expands the predicted apicoplast proteome with high accuracy**

198 Apicoplast BioID provided the first experimental profile of the blood-stage apicoplast  
199 proteome but is potentially limited in sensitivity due to 1) difficulty in detecting low abundance  
200 peptides in complex mixtures; 2) inability of the promiscuous biotin ligase to access target  
201 proteins that are buried in membranes or protein complexes; or 3) stage-specific protein  
202 expression. Currently available bioinformatic predictions of apicoplast proteins circumvent these  
203 limitations, albeit at the expense of a low PPV (Fig 2D). We reasoned that increasing the number  
204 of high-confidence apicoplast proteins used to train algorithms could improve the accuracy of a  
205 prediction algorithm while maintaining high sensitivity. In addition, inclusion of exported  
206 proteins that traffic through the ER, which are common false positives in previous prediction  
207 algorithms, would also improve our negative training set.

208 We used our list of previously known apicoplast proteins (S2 Table) as well as newly-  
209 identified apicoplast proteins from BioID (S1 Table) to construct a positive training set of 205  
210 apicoplast proteins (S4 Table). As a negative training set, we used our previous list of 451 signal  
211 peptide-containing non-apicoplast proteins (S2 Table). For each of the 656 proteins in the  
212 training set, we calculated the frequencies of all 20 canonical amino acids in a 50 amino acid

213 region immediately following the predicted signal peptide cleavage site. In addition, given that  
214 apicoplast proteins have a characteristic transcriptional profile in blood-stage parasites [37] and  
215 that analysis of transcriptional profile has previously enabled identification of apicoplast proteins  
216 in the related apicomplexan *Toxoplasma gondii* [38], we obtained transcript levels at 8 time  
217 points during intraerythrocytic development from previous RNA-Seq data [39]. Altogether, each  
218 protein was represented by a vector of dimension 28 (20 amino acid frequencies plus 8 transcript  
219 levels). These 28-dimensional vectors were used as inputs to train a neural network with 3  
220 hidden layers (Fig 4A and S5 Table). Six-fold cross-validation was used for training, wherein the  
221 training set was divided into 6 equal parts (folds) to train 6 separate models. Each time, 5 folds  
222 were used to train the model and 1 fold to measure the performance of the trained model.

223 We named this model PlastNN (ApicoPLAST Neural Network). PlastNN recognized  
224 apicoplast proteins with a cross-validation accuracy of  $96 \pm 2\%$  (mean  $\pm$  SD across 6 models),  
225 along with sensitivity of  $95 \pm 5\%$  and PPV of  $95 \pm 4\%$  (Fig 4B). This performance was higher  
226 than logistic regression on the same dataset (average accuracy = 91%; S6 Table). Combining the  
227 transcriptome features and the amino acid frequencies improves performance: the same neural  
228 network architecture with amino acid frequencies alone as input resulted in a lower average  
229 accuracy of 91%, while using transcriptome data alone resulted in an average accuracy of 90%  
230 (S6 Table). Comparison of the performance of PlastNN to existing prediction algorithms  
231 indicates that PlastNN distinguishes apicoplast and non-apicoplast proteins with higher accuracy  
232 than any previous prediction method (Fig 4C). To identify new apicoplast proteins, PlastNN was  
233 used to predict the apicoplast status of 450 predicted signal peptide-containing proteins that were  
234 not in our positive or negative training sets. Since PlastNN is composed of 6 models, we  
235 designated proteins as “apicoplast” if plastid localization was predicted by  $\geq 4$  of the 6 models.

236 PlastNN predicts 118 out of the 450 proteins to be targeted to the apicoplast (S7 Table).  
237 Combining these results with those from apicoplast BioID (S1 Table) and with experimental  
238 localization of proteins from the literature (S2 Table) yielded a compiled proteome of 346  
239 putative nuclear-encoded apicoplast proteins (S8 Table).

240

### 241 **The apicoplast proteome contains novel and essential proteins**

242 To determine whether candidate apicoplast proteins from this study have the potential to  
243 reveal unexplored parasite biology or are candidate antimalarial drug targets, we assessed the  
244 novelty and essentiality of the identified proteins. We found that substantial fractions of the  
245 BioID and PlastNN proteomes (49% and 71%, respectively) and 50% of the compiled apicoplast  
246 proteome represented proteins that could not be assigned to an established apicoplast pathway  
247 and therefore might be involved in novel organellar processes (Fig 5A). Furthermore, we  
248 identified orthologs of identified genes in the 150 genomes present in the OrthoMCL database  
249 [40]: 39% of the compiled apicoplast proteome were unique to apicomplexan parasites, with  
250 58% of these proteins found only in *Plasmodium* spp. (Fig 5B). Of the 61% of proteins that were  
251 conserved outside of the Apicomplexa, we note that many of these contain conserved domains or  
252 are components of well-established pathways, such as DNA replication, translation, and  
253 metabolic pathways (S8 Table). This analysis indicates that many of the newly identified  
254 proteins are significantly divergent from proteins in their metazoan hosts.

255 Consistent with the critical role of the apicoplast in parasite biology, a genome-scale  
256 functional analysis of genes in the rodent malaria parasite *P. berghei* showed that numerous  
257 apicoplast proteins are essential for blood-stage survival [41]. Using this dataset, we found that  
258 77% of proteins in the compiled apicoplast proteome that had *P. berghei* homologs analyzed by

259 PlasmoGEM were important for normal blood-stage parasite growth (Fig 5C). Notably, of 49  
260 proteins that were annotated explicitly with “unknown function” in their gene description and for  
261 which essentiality data are available, 38 are important for normal parasite growth, indicating that  
262 the high rate of essentiality for apicoplast proteins is true of both previously known and newly  
263 discovered proteins. In concordance with the PlasmoGEM data, recent genome-scale transposon  
264 mutagenesis in *P. falciparum* [42] identified 75% of proteins in the compiled apicoplast  
265 proteome as non-mutable (Fig 5D), suggesting essential functions in the blood stage. Overall,  
266 these data suggest that we have identified dozens of novel proteins that are likely critical for  
267 apicoplast biology.

268

### 269 **Localization of candidate apicoplast proteins identifies novel proteins of biological interest**

270 Our analyses of the apicoplast BioID and PlastNN datasets suggested that these  
271 approaches enabled accurate, large-scale identification of apicoplast proteins (Figs 2D and 4C)  
272 and included many proteins of potential biological interest due to their novelty or their  
273 essentiality in the blood stage (Fig 5). As proof-of-concept of the utility of these datasets, several  
274 newly identified apicoplast proteins were experimentally validated. Fortuitously, while this  
275 manuscript was in preparation, 7 new apicoplast membrane proteins in *P. berghei* were validated  
276 by Sayers et al. [43]. Of these, apicoplast BioID identified the *P. falciparum* homologs of 3  
277 proteins (PF3D7\_1145500/ABCB3, PF3D7\_0302600/ABCB4, and PF3D7\_1021300) and  
278 PlastNN identified one (PF3D7\_0908100). In addition to these, we also selected 4 candidates  
279 from apicoplast BioID and 2 from PlastNN to validate.

280 From the BioID list (S1 Table), we chose a rhomboid protease homolog ROM7  
281 (PF3D7\_1358300) and 3 conserved *Plasmodium* proteins of unknown function  
282 (PF3D7\_0521400, PF3D7\_1472800, and PF3D7\_0721100) and generated cell lines expressing

283 C-terminal GFP fusions from an ectopic locus in Dd2<sup>attB</sup> parasites. With the exception of ROM7,  
284 which was chosen because of the biological interest of rhomboid proteases, we focused on  
285 proteins of unknown function to begin characterizing the large number of unannotated proteins  
286 in the *Plasmodium* genome (see Materials and Methods for additional candidate selection  
287 criteria).

288 To assess the apicoplast localization of each candidate, we first detected the apicoplast-  
289 dependent cleavage of each protein as a marker of its import. Most nuclear-encoded apicoplast  
290 proteins are proteolytically processed to remove *N*-terminal targeting sequences following  
291 successful import into the apicoplast [44, 45]. This processing is abolished in parasites rendered  
292 “apicoplast-minus” by treatment with an inhibitor (actinonin) to cause apicoplast loss [16, 46].  
293 Comparison of protein molecular weight in apicoplast-intact and -minus parasites showed that  
294 ROM7, PF3D7\_1472800, and PF3D7\_0521400 (but not PF3D7\_0721100) were cleaved in an  
295 apicoplast-dependent manner (Fig 6A).

296 Next, we demonstrated co-localization of these three proteins with the apicoplast marker  
297 ACP by co-immunofluorescence analysis (co-IFAs; Fig 6B). ROM7, PF3D7\_1472800, and  
298 PF3D7\_0521400 clearly co-localized with ACP. PF3D7\_0721100 localized to few large puncta  
299 not previously described for any apicoplast protein, which partly co-localized with the apicoplast  
300 marker ACP (Fig 6B and S4 Fig) but also appeared adjacent to ACP staining (Fig 6B and S4 Fig,  
301 arrowheads).

302 Finally, we localized the candidate-GFP fusions by live fluorescence microscopy and  
303 assessed the apicoplast dependence of their localization. ROM7-GFP, PF3D7\_1472800-GFP,  
304 and PF3D7\_0521400-GFP localized to branched structures characteristic of the apicoplast (S5  
305 Fig). Upon actinonin treatment to render parasites “apicoplast-minus,” these proteins

306 mislocalized to diffuse puncta (S5 Fig) previously observed for known apicoplast proteins [46].  
307 Interestingly, while in untreated live parasites PF3D7\_0721100-GFP again localized to a few  
308 large bright puncta, this protein also relocated to the typical numerous diffuse puncta seen for  
309 genuine apicoplast proteins in apicoplast-minus parasites (S5 Fig).

310 Taken together, these data validate the apicoplast localization of ROM7,  
311 PF3D7\_0521400, and PF3D7\_1472800. Though transit peptide cleavage and the characteristic  
312 branched structure were not detected for PF3D7\_0721100, partial co-localization with ACP and  
313 the mislocalization of PF3D7\_0721100-GFP to puncta characteristic of apicoplast-minus  
314 parasites indicates that this protein may also be a true apicoplast protein. Further studies using  
315 either endogenously tagged protein or antibody raised against endogenous protein will be  
316 necessary to better characterize this localization.

317 From the PlastNN list (S7 Table), we selected 2 proteins of unknown function,  
318 PF3D7\_1349900 and PF3D7\_1330100. As above, each protein was appended with a C-terminal  
319 GFP tag and expressed as a second copy in Dd2<sup>attB</sup> parasites. In agreement with apicoplast  
320 localization for each of these proteins, actinonin-mediated apicoplast loss caused loss of transit  
321 peptide processing (Fig 7A) and redistribution from a branched structure to diffuse puncta (S6  
322 Fig). Furthermore, both proteins co-localized with the apicoplast marker ACP (Fig 7B).

323 Altogether, we confirmed the apicoplast localization of 5 novel apicoplast proteins, with  
324 a sixth protein (PF3D7\_0721100) having potential apicoplast localization. These results,  
325 combined with validation of 4 apicoplast membrane proteins predicted in our datasets by Sayers  
326 et al., show that the apicoplast BioID and PlastNN datasets can successfully be used to prioritize  
327 apicoplast proteins of biological interest.

328

329 **A novel apicoplast protein ABCF1 is essential and required for organelle biogenesis**

330           Given the potential of ATP binding cassette (ABC) proteins as drug targets, we sought to  
331 experimentally validate the essentiality of newly discovered apicoplast ABC proteins and assess  
332 their roles in metabolism or organelle biogenesis. Apicoplast BioID identified four ABC  
333 proteins: 3 ABCB-family proteins (ABCB3, ABCB4, and ABCB7) and an ABCF-family protein  
334 (ABCF1). We expected that these proteins might be important for apicoplast biology, as ABCB-  
335 family proteins are integral membrane proteins that typically act as small molecule transporters  
336 and ABCF-family proteins, which do not contain transmembrane domains, are typically involved  
337 in translation regulation [47, 48]. We pursued reverse genetic characterization of ABCB7  
338 (PF3D7\_1209900) and ABCF1 (PF3D7\_0813700), as the essentiality of ABCB3 and ABCB4  
339 has been previously studied [43, 49].

340           To assess localization and function of ABCB7 and ABCF1, we modified their  
341 endogenous loci to contain a C-terminal triple HA tag and tandem copies of a tetracycline  
342 repressor (TetR)-binding RNA aptamer in the 3' UTR of either gene (S7 Fig) [50, 51]. Co-IFA  
343 confirmed ABCF1-3xHA colocalization with the apicoplast marker ACP (Fig 8A). ABCB7-  
344 3xHA localized to elongated structures that may be indicative of an intracellular organelle but  
345 rarely co-localized with ACP, indicating that it has a primarily non-apicoplast localization and is  
346 likely a false positive from the BioID dataset (S8A Fig).

347           Taking advantage of the TetR-binding aptamers in the 3' UTR of ABCF1, we determined  
348 the essentiality and knockdown phenotype of this protein. In the presence of anhydrotetracycline  
349 (ATc), binding of the aptamer by a TetR-DOZI repressor is inhibited and ABCF1 is expressed.  
350 Upon removal of ATc, repressor binding blocks gene expression [50, 51]. Knockdown of  
351 ABCF1 caused robust parasite growth inhibition (Fig 8B-C). Growth inhibition of ABCF1-



352 deficient parasites was reversed in the presence of isopentenyl pyrophosphate (IPP) (Fig 8C),  
353 which bypasses the need for a functional apicoplast [46], indicating that ABCF1 has an essential  
354 apicoplast function. Essential apicoplast functions can be placed into two broad categories: those  
355 involved in organelle biogenesis, and those involved solely in IPP production. Disruption of  
356 proteins required for organelle biogenesis causes apicoplast loss, while disruption of proteins  
357 involved in IPP production does not [16, 46, 52]. We determined whether knockdown of ABCF1  
358 caused apicoplast loss by assessing 1) absence of the apicoplast genome, 2) loss of transit peptide  
359 processing of nuclear-encoded apicoplast proteins, and 3) relocalization of apicoplast proteins to  
360 puncta. Indeed, the apicoplast:nuclear genome ratio drastically decreased in ABCF1 knockdown  
361 parasites beginning 1 cycle after knockdown (Fig 8D), and western blot showed that the  
362 apicoplast protein ClpP was not processed in ABCF1 knockdown parasites (Fig 8E).  
363 Furthermore, IFA of the apicoplast marker ACP confirmed redistribution from an intact plastid  
364 to diffuse cytosolic puncta (Fig 8F). In contrast to ABCF1, a similar knockdown of ABCB7  
365 caused no observable growth defect after four growth cycles despite significant reduction in  
366 protein levels (S8B-C Fig). Together, these results show that ABCF1 is a novel and essential  
367 apicoplast protein with a previously unknown function in organelle biogenesis.

368

## 369 **Discussion**

370 Since the discovery of the apicoplast, identification of its proteome has been a pressing  
371 priority. We report the first large-scale proteomic analysis of the apicoplast in blood-stage  
372 malaria parasites, which identified 187 candidate proteins with 52% sensitivity and 91% PPV. A  
373 number of groups have also profiled parasite-specific membrane compartments using proximity  
374 biotinylation but observed contamination with proteins in or trafficking through the ER,

375 preventing accurate identification of these proteomes without substantial manual curation and  
376 validation [23, 24, 26-29]. This background labeling is expected since proteins traffic through the  
377 ER en route to several parasite-specific compartments, including the parasitophorous vacuole,  
378 host cytoplasm, food vacuole, and invasion organelles. The high specificity of our apicoplast  
379 BioID proteome depended on 1) the use of a control cell line expressing ER-localized GFP-  
380 BirA\* to detect enrichment of apicoplast proteins from background ER labeling and 2) strong  
381 positive and negative controls to set an accurate threshold. We suspect a similar strategy to detect  
382 nonspecific ER background may also improve the specificity of proteomic datasets for other  
383 parasite-specific, endomembrane-derived compartments.

384         Leveraging our successful proteomic analysis, we used these empirical data as an updated  
385 training set to also improve computational predictions of apicoplast proteins. PlastNN identified  
386 an additional 118 proteins with 95% sensitivity and 95% PPV. Although two previous prediction  
387 algorithms, PATS and ApicoAP, also applied machine learning to the problem of transit peptide  
388 prediction, we reasoned that their low accuracy arose from the small training sets used  
389 (ApicoAP) and the use of cytosolic as well as endomembrane proteins in the negative training set  
390 (PATS). By using an expanded positive training set based on proteomic data and limiting our  
391 training sets to only signal peptide-containing proteins, we developed an algorithm with higher  
392 sensitivity than BioID and higher accuracy than previous apicoplast protein prediction models.  
393 Inevitably some false positives from the BioID dataset would have been used for neural network  
394 training and cross-validation. While this may slightly influence the PPV of the PlastNN list, we  
395 expect that the substantially larger fraction of true positives in the training set mitigated the  
396 effects of any false positives. Importantly, as more apicoplast and non-apicoplast proteins in *P.*  
397 *falciparum* parasites are experimentally validated, updated training sets can be used to re-train

398 PlastNN. Moreover, PlastNN suggests testable hypotheses regarding the contribution of  
399 sequence-based and temporal regulation to protein trafficking in the ER.

400 Overall, we have compiled a high-confidence apicoplast proteome of 346 proteins that  
401 are rich in novel and essential functions (Fig 5). This proteome likely represents a majority of  
402 soluble apicoplast proteins, since 1) our bait for proximity biotinylation targeted to the lumen  
403 and 2) most soluble proteins use canonical targeting sequences that can be predicted. An  
404 important next step will be to expand the coverage of apicoplast membrane proteins, which more  
405 often traffic via distinctive routes [53, 54]. Performing proximity biotinylation with additional  
406 bait proteins may identify such atypical apicoplast proteins. In the current study, our bait was an  
407 inert fluorescent protein targeted to the apicoplast lumen to minimize potential toxicity of the  
408 construct. The success of this apicoplast GFP bait gives us confidence to attempt more  
409 challenging baits, including proteins localized to sub-organellar membrane compartments or  
410 components of the protein import machinery. Performing apicoplast BioID in liver and mosquito  
411 stages may also define apicoplast functions in these stages. This compiled proteome represents a  
412 substantial improvement upon previous bioinformatics predictions of apicoplast proteins and  
413 provides a strong foundation for further refinement. In analogy to progress on the mammalian  
414 mitochondrial proteome, which over the course of decades has been expanded and refined by a  
415 combination of proteomic, computational, and candidate-based approaches [55, 56], we expect  
416 that future proteomic, computational, and candidate-based approaches to identify apicoplast  
417 proteins will be critical for ultimately determining a comprehensive apicoplast proteome,

418 Organellar proteomes are valuable hypothesis-generating tools. Already several  
419 candidates of biological interest based on their biochemical function annotations were validated.  
420 We demonstrated an unexpected role for the ATP-binding cassette protein *Pf*ABCF1 in

421 apicoplast biogenesis. ABCF proteins are understudied compared to other ABC-containing  
422 proteins but tend to have roles in translation regulation [47]. An *E. coli* homolog, EttA, regulates  
423 translation initiation in response to cellular ATP levels [57, 58], and mammalian and yeast  
424 ABCF1 homologs also interact with ribosomes and regulate translation [59-62]. By analogy,  
425 *Pf*ABCF1 may regulate the prokaryotic translation machinery in the apicoplast, although the  
426 mechanistic basis for the severe defect in parasite replication upon loss of *Pf*ABCF1 is unclear.

427 We also validated *Pf*ROM7 as an apicoplast-localized rhomboid protease. Rhomboid  
428 proteases are a diverse family of intramembrane serine proteases found in all domains of life. In  
429 the Apicomplexa, rhomboids have been studied primarily for their roles in processing adhesins  
430 on the parasite cell surface [63], although the functions of most apicomplexan rhomboids are still  
431 unknown. Little is known about ROM7 other than that it appears to be absent from coccidians  
432 and was refractory to deletion in *P. berghei* [64, 65]. However, a rhomboid protease was recently  
433 identified as a component of symbiont-derived ERAD-like machinery (SELMA) that transports  
434 proteins across a novel secondary plastid membrane in diatoms [66], indicating that ROM7 may  
435 similarly play a role in apicoplast protein import in *Plasmodium* parasites. Neither *Pf*ABCF1 nor  
436 *Pf*ROM7 had known roles in the apicoplast prior to their identification in this study,  
437 underscoring the utility of unbiased approaches to identify new organellar proteins. Moreover,  
438 the apicoplast is one of few models for complex plastids that permits functional analysis of  
439 identified proteins to investigate the molecular mechanisms underpinning serial endosymbiosis.  
440 A summary of all candidate proteins validated in this study is shown in S9 Table.

441 A recent study aimed at identifying apicoplast membrane transporters highlights the  
442 difficulty in identifying novel apicoplast functions in the absence of a high-confidence proteome  
443 [43]. Taking advantage of the tractable genetics in murine *Plasmodium* species, Sayers et al.

444 screened 27 candidates in *P. berghei* for essentiality and apicoplast localization. Following >50  
445 transfections, 3 essential and 4 non-essential apicoplast membrane proteins were identified. One  
446 newly identified essential apicoplast membrane protein was then validated to be required for  
447 apicoplast biogenesis in *P. falciparum*. In contrast, even though our study was not optimized to  
448 identify membrane proteins, the combination of BioID and PlastNN identified 2 known  
449 apicoplast transporters, 4 of the new apicoplast membrane protein homologs, and 56 additional  
450 proteins predicted to contain at least one transmembrane domain. A focused screen of higher  
451 quality candidates in *P. falciparum* is likely to be more rapid and yield the most relevant biology.  
452 Our high-confidence apicoplast proteome will streamline these labor-intensive screens, focusing  
453 on strong candidates for downstream biological function elucidation. As methods for analyzing  
454 gene function in *P. falciparum* parasites continue to improve, this resource will become  
455 increasingly valuable for characterizing unknown organellar pathways.

456

## 457 **Materials and Methods**

### 458 **Parasite growth**

459 *Plasmodium falciparum* Dd2<sup>attB</sup> [31] (MRA-843) were obtained from MR4. NF54<sup>Cas9+T7 Polymerase</sup>  
460 parasites [67] were a gift from Jacquin Niles. Parasites were grown in human erythrocytes (2%  
461 hematocrit) obtained from the Stanford Blood Center in RPMI 1640 media (Gibco)  
462 supplemented with 0.25% Albumax II (Gibco), 2 g/L sodium bicarbonate, 0.1 mM hypoxanthine  
463 (Sigma), 25 mM HEPES, pH 7.4 (Sigma), and 50 µg/L gentamicin (Gold Biotechnology) at  
464 37°C, 5% O<sub>2</sub>, and 5% CO<sub>2</sub>.

465

### 466 **Vector construction**

467 Oligonucleotides were purchased from the Stanford Protein and Nucleic Acid facility or IDT.  
468 gBlocks were ordered from IDT. Molecular cloning was performed using In-Fusion cloning  
469 (Clontech) or Gibson Assembly (NEB). Primer and gBlock sequences are available in S10 Table.

470 To generate the plasmid pRL2-ACP<sub>L</sub>-GFP for targeting transgenes to the apicoplast, the  
471 first 55 amino acids from ACP were PCR amplified with primers MB015 and MB016 and were  
472 inserted in front of the GFP in the pRL2 backbone [68] via the AvrII/BsiWI sites. To generate  
473 pRL2-ACP<sub>L</sub>-GFP-BirA\* for targeting a GFP-BirA\* fusion to the apicoplast, GFP was amplified  
474 from pLN-ENR-GFP using primers MB087 and MB088 and BirA\* was amplified from  
475 pcDNA3.1 mycBioID (Addgene 35700) [20] using primers MB089 and MB090. These inserts  
476 were simultaneously cloned into BsiWI/AflIII-digested pRL2-ACP<sub>L</sub>-GFP to generate pRL2-  
477 ACP<sub>L</sub>-GFP-BirA\*. To generate pRL2-SP-GFP-BirA\*-SDEL for targeting GFP-BirA\* to the ER,  
478 SP-GFP-BirA\*-SDEL was PCR amplified from pRL2-ACP<sub>L</sub>-GFP-BirA\* using primers MB093  
479 and MB094 and was cloned into AvrII/AflIII-digested pRL2-ACP<sub>L</sub>-GFP. For GFP-tagging to  
480 confirm localization of proteins identified by apicoplast BioID, full-length genes were amplified  
481 from parasite cDNA with primers as described in S10 Table and were cloned into the  
482 AvrII/BsiWI sites of pRL2-ACP<sub>L</sub>-GFP.

483 For CRISPR-Cas9-based editing of endogenous ABCB7 and ABCF1 loci, sgRNAs were  
484 designed using the eukaryotic CRISPR guide RNA/DNA design tool (<http://grna.ctegd.uga.edu/>).  
485 To generate a linear plasmid for CRISPR-Cas9-based editing, left homology regions were  
486 amplified with primers MB256 and MB257 (ABCB7) or MB260 and MB261 (ABCF1) and right  
487 homology regions were amplified with MB258 and MB259 (ABCB7) or MB262 and MB263  
488 (ABCF1). For each gene, a gBlock containing the recoded coding sequence C-terminal of the  
489 CRISPR cut site and a triple HA tag was synthesized with appropriate overhangs for Gibson

490 Assembly. This fragment and the appropriate left homology region were simultaneously cloned  
491 into the FseI/ApaI sites of the linear plasmid pSN054-V5. Next, the appropriate right homology  
492 region and a gBlock containing the sgRNA expression cassette were simultaneously cloned into  
493 the AscI/I-SceI sites of the resultant vectors to generate the plasmids pSN054-ABCB7-TetR-  
494 DOZI and pSN054-ABCF1-TetR-DOZI.

495

### 496 **Parasite transfection**

497 Transfections were carried out using variations on the spontaneous uptake method [69, 70]. In  
498 the first variation, 100 µg of each plasmid was ethanol precipitated and resuspended in 30 µL  
499 sterile TE buffer and was added to 150 µL packed RBCs resuspended to a final volume of 400  
500 µL in cytomix. The mixture was transferred to a 0.2 cm electroporation cuvette (Bio-Rad) and  
501 was electroporated at 310 V, 950 µF, infinity resistance in a Gene Pulser Xcell electroporation  
502 system (Bio-Rad) before allowing parasites to invade. Drug selection was initiated 3 days after  
503 transfection. Alternatively, 50 µg of each plasmid was ethanol precipitated and resuspended in  
504 0.2 cm electroporation cuvettes in 100 µL TE buffer, 100 µL RPMI containing 10 mM HEPES-  
505 NaOH, pH 7.4, and 200 µL packed uninfected RBCs. RBCs were pulsed with 8 square wave  
506 pulses of 365 V x 1 ms separated by 0.1 s. RBCs were allowed to reseal for 1 hour in a 37°C  
507 water bath before allowing parasites to invade. Drug selection was initiated 4 days after  
508 transfection. All transfectants were selected with 2.5 µg/mL Blasticidin S (Research Products  
509 International). Additionally, BioID-ER parasites were selected with 125 µg/mL G418 sulfate  
510 (Corning) and ABCB7 and ABCF1 TetR-DOZI parasites were grown in the presence of 500 nM  
511 ATc. Transfections for generating BioID constructs (Fig 1) and expression of GFP-tagged  
512 candidates (Figs 6 and 7) were performed in the Dd2<sup>attB</sup> background. Transfections for CRISPR

513 editing were performed with the NF54<sup>Cas9+T7 Polymerase</sup> background and clonal parasite lines were  
514 obtained by limiting dilution.

515 Correct modification of transfectant genomes was confirmed by PCR. Briefly, 200  $\mu$ L of  
516 2% hematocrit culture was pelleted and resuspended in water, and 2  $\mu$ L of the resulting lysate  
517 was used as template for PCR with Phusion polymerase (NEB). PCR targets and their  
518 corresponding primer pairs are as follows: integrated *attL* site, p1 + p2; integrated *attR* site,  
519 MW001 + MW003; unintegrated *attB* site, MW004 + MW003; ABCB7 unintegrated left  
520 homology region (LHR), MB269 + MB270; ABCB7 integrated LHR, MB269 + MB255;  
521 ABCB7 unintegrated right homology region (RHR), MB281 + MB278; ABCB7 integrated RHR,  
522 MB276 + MB278; ABCF1 unintegrated LHR, MB271 + MB272; ABCF1 integrated LHR,  
523 MB271 + MB255; ABCF1 unintegrated RHR, MB282 + MB283; ABCF1 integrated RHR,  
524 MB276 + MB283.

525

### 526 **Biotin labeling**

527 To label parasites for analysis by streptavidin blot, fixed imaging, or mass spectrometry, cultures  
528 of majority ring-stage parasites were treated with 50  $\mu$ M biotin or with a DMSO vehicle-only  
529 control. Cultures were harvested for analysis 16 hours later as majority trophozoites and  
530 schizonts.

531

### 532 **Actinonin treatment and IPP rescue**

533 To generate apicoplast-minus parasites, ring-stage cultures were treated with 10  $\mu$ M actinonin  
534 (Sigma) and 200  $\mu$ M IPP (Isoprenoids, LLC) and cultured for 3 days before analysis.

535



536 **Western blotting**

537 Parasites were separated from RBCs by lysis in 0.1% saponin and were washed in PBS. Parasite  
538 pellets were resuspended in PBS containing 1X NuPAGE LDS sample buffer with 50 mM DTT  
539 and were boiled at 95°C for 10 minutes before separation on NuPAGE or Bolt Bis-Tris gels and  
540 transfer to nitrocellulose. Membranes were blocked in 0.1% Hammarsten casein (Affymetrix) in  
541 0.2X PBS with 0.01% sodium azide. Antibody incubations were performed in a 1:1 mixture of  
542 blocking buffer and TBST (Tris-buffered saline with Tween-20; 10 mM Tris, pH 8.0, 150 mM  
543 NaCl, 0.25 mM EDTA, 0.05% Tween 20). Blots were incubated with primary antibody for either  
544 1 hour at room temperature or at 4°C overnight at the following dilutions: 1:20,000 mouse- $\alpha$ -  
545 GFP JL-8 (Clontech 632381); 1:20,000 rabbit- $\alpha$ -*Plasmodium* aldolase (Abcam ab207494);  
546 1:1000 rat- $\alpha$ -HA 3F10 (Sigma 11867423001); 1:4000 rabbit- $\alpha$ -PfClpP [71]. Blots were washed  
547 once in TBST and were incubated for 1 hour at room temperature in a 1:10,000 dilution of the  
548 appropriate secondary antibody: IRDye 800CW donkey- $\alpha$ -rabbit; IRDye 680LT goat- $\alpha$ -mouse;  
549 IRDye 680LT goat- $\alpha$ -rat (LI-COR Biosciences). For detection of biotinylated proteins, blots  
550 were incubated with 1:1000 IRDye 680RD streptavidin for one hour at room temperature. Blots  
551 were washed three times in TBST and once in PBS before imaging on a LI-COR Odyssey  
552 imager.

553

554 **Microscopy**

555 For live imaging, parasites were settled onto glass-bottom microwell dishes (MatTek P35G-1.5-  
556 14-C) or Lab-Tek II chambered coverglass (ThermoFisher 155409) in PBS containing 0.4%  
557 glucose and 2  $\mu$ g/mL Hoechst 33342 stain (ThermoFisher H3570).

558 For fixed imaging of biotinylated proteins in cells, biotin-labeled parasites were  
559 processed as in Tonkin et al. [72] with modifications. Briefly, parasites were washed in PBS and  
560 were fixed in 4% paraformaldehyde (Electron Microscopy Science 15710) and 0.015%  
561 glutaraldehyde (Electron Microscopy Sciences 16019) in PBS for 30 minutes. Cells were washed  
562 once in PBS, resuspended in PBS, and allowed to settle onto poly-L-lysine-coated coverslips  
563 (Corning) for 60 minutes. Coverslips were then washed once with PBS, permeabilized in 0.1%  
564 Triton X-100 in PBS for 10 minutes, and washed twice more in PBS. Cells were treated with 0.1  
565 mg/mL sodium borohydride in PBS for 10 minutes, washed once in PBS, and blocked in 3%  
566 BSA in PBS. To visualize biotin-labeled proteins, coverslips were incubated with 1:1000  
567 AlexaFluor 546-conjugated streptavidin (ThermoFisher S11225) for one hour followed by three  
568 washes in PBS. No labeling of GFP was necessary, as these fixation conditions preserve intrinsic  
569 GFP fluorescence [72]. Coverslips were mounted onto slides with ProLong Gold antifade  
570 reagent with DAPI (ThermoFisher) and were sealed with nail polish prior to imaging.

571 For immunofluorescence analysis, parasites were processed as above except that fixation  
572 was performed with 4% paraformaldehyde and 0.0075% glutaraldehyde in PBS for 20 minutes  
573 and blocking was performed with 5% BSA in PBS. Following blocking, primary antibodies were  
574 used in 5% BSA in PBS at the following concentrations: 1:500 rabbit- $\alpha$ -PfACP [73]; 1:1000  
575 rabbit- $\alpha$ -PfBip1:1000 (a gift from Sebastian Mikolajczak and Stefan Kappe); 1:500 mouse- $\alpha$ -  
576 GFP JL-8 (Clontech 632381); 1:100 rat- $\alpha$ -HA 3F10 (Sigma 11867423001). Coverslips were  
577 washed three times in PBS, incubated with goat- $\alpha$ -rat 488 (ThermoFisher A-11006), goat- $\alpha$ -  
578 mouse 488 (ThermoFisher A11029), or donkey- $\alpha$ -rabbit 568 (ThermoFisher A10042) secondary  
579 antibodies at 1:3000, and washed three times in PBS prior to mounting as above.

580 Live and fixed cells were imaged with 100X, 1.4 NA or 100X, 1.35 NA objectives on an  
581 Olympus IX70 microscope with a DeltaVision system (Applied Precision) controlled with  
582 SoftWorx version 4.1.0 and equipped with a CoolSnap-HQ CCD camera (Photometrics). Images  
583 were taken in a single z-plane, with the exception of those presented in Figs 1D, 8A, and S8A,  
584 which were captured as a series of z-stacks separated by 0.2  $\mu\text{m}$  intervals, deconvolved, and  
585 displayed as maximum intensity projections. Brightness and contrast were adjusted in Fiji  
586 (ImageJ) for display purposes. Image capture and processing conditions were identical for  
587 micrographs of the same cell line when multiple examples are displayed (S4 Fig) or when  
588 comparing untreated to actinonin-treated cells (S5 and S6 Figs).

589

#### 590 **Biotin pulldowns, mass spectrometry, and data analysis**

591 Biotin-labeled parasites were harvested by centrifugation and were released from the host RBC  
592 by treatment with 0.1% saponin/PBS. Parasites were washed twice more with 0.1% saponin/PBS  
593 followed by PBS and were either used immediately for analysis or were stored at  $-80^{\circ}\text{C}$ . Parasite  
594 pellets were resuspended in RIPA buffer [50 mM Tris-HCl, pH 7.4, 150 mM NaCl, 0.1% SDS,  
595 0.5% sodium deoxycholate, 1% Triton X-100, 1 mM EDTA] containing a protease inhibitor  
596 cocktail (Pierce) and were lysed on ice for 30 minutes with occasional pipetting. Insoluble debris  
597 was removed by centrifugation at 16,000  $\times g$  for 15 minutes at  $4^{\circ}\text{C}$ . Biotinylated proteins were  
598 captured using High Capacity Streptavidin Agarose beads (Pierce) for 2 hours at room  
599 temperature. Beads were then washed three times with RIPA buffer, three times with SDS wash  
600 buffer [50 mM Tris-HCl, pH 7.4, 150 mM NaCl, 2% SDS], six times with urea wash buffer [50  
601 mM Tris-HCl, pH 7.4, 150 mM NaCl, 8 M urea], and three times with 100 mM ammonium  
602 bicarbonate. Proteins were reduced with 5 mM DTT for 60 minutes at  $37^{\circ}\text{C}$  followed by

603 treatment with 14 mM iodoacetamide (Pierce) at room temperature for 45 minutes. Beads were  
604 washed once with 100 mM ammonium bicarbonate and were digested with 10  $\mu$ g/mL trypsin  
605 (Promega) at 37°C overnight. The following day, samples were digested with an additional 5  
606  $\mu$ g/mL trypsin for 3-4 hours. Digested peptides were separated from beads by addition of either  
607 35% or 50% final concentration acetonitrile, and peptides were dried on a SpeedVac prior to  
608 desalting with C18 stage tips.

609 Desalted peptides were resuspended in 0.1% formic acid and analyzed by online capillary  
610 nanoLC-MS/MS. Samples were separated on an in-house made 20 cm reversed phase column  
611 (100  $\mu$ m inner diameter, packed with ReproSil-Pur C18-AQ 3.0  $\mu$ m resin (Dr. Maisch GmbH))  
612 equipped with a laser-pulled nanoelectrospray emitter tip. Peptides were eluted at a flow rate of  
613 400 nL/min using a two-step linear gradient including 2-25% buffer B in 70 min and 25-40% B  
614 in 20 min (buffer A: 0.2% formic acid and 5% DMSO in water; buffer B: 0.2% formic acid and  
615 5% DMSO in acetonitrile) in an Eksigent ekspert nanoLC-425 system (AB Sciex). Peptides were  
616 then analyzed using a LTQ Orbitrap Elite mass spectrometer (Thermo Scientific). Data  
617 acquisition was executed in data dependent mode with full MS scans acquired in the Orbitrap  
618 mass analyzer with a resolution of 60000 and m/z scan range of 340-1600. The top 20 most  
619 abundant ions with intensity threshold above 500 counts and charge states 2 and above were  
620 selected for fragmentation using collision- induced dissociation (CID) with isolation window of  
621 2 m/z, normalized collision energy of 35%, activation Q of 0.25 and activation time of 5 ms. The  
622 CID fragments were analyzed in the ion trap with rapid scan rate. In additional runs, the top 10  
623 most abundant ions with intensity threshold above 500 counts and charge states 2 and above  
624 were selected for fragmentation using higher energy collisional dissociation (HCD) with  
625 isolation window of 2 m/z, normalized collision energy of 35%, and activation time of 25 ms.

626 The HCD fragments were analyzed in the Orbitrap with a resolution of 15000. Dynamic  
627 exclusion was enabled with repeat count of 1 and exclusion duration of 30 s. The AGC target  
628 was set to 1000000, 50000, and 5000 for full FTMS scans, FTMSn scans and ITMSn scans,  
629 respectively. The maximum injection time was set to 250 ms, 250 ms, and 100 ms for full FTMS  
630 scans, FTMSn scans and ITMSn scans, respectively.

631 The resulting spectra were searched against a “target-decoy” sequence database [74]  
632 consisting of the PlasmoDB protein database (release 32, released April 19, 2017), the Uniprot  
633 human database (released February 2, 2015), and the corresponding reversed sequences using the  
634 SEQUEST algorithm (version 28, revision 12). The parent mass tolerance was set to 50 ppm and  
635 the fragment mass tolerance to 0.6 Da for CID scans, 0.02 Da for HCD scans. Enzyme  
636 specificity was set to trypsin. Oxidation of methionines was set as variable modification and  
637 carbamidomethylation of cysteines was set as static modification. Peptide identifications were  
638 filtered to a 1% peptide false discovery rate using a linear discriminator analysis [75]. Precursor  
639 peak areas were calculated for protein quantification.

640

#### 641 **Apicoplast protein prediction algorithms and positive/negative control apicoplast proteins**

642 To generate updated lists of PATS-predicted apicoplast proteins, nuclear-encoded *P. falciparum*  
643 3D7 proteins (excluding pseudogenes) from PlasmoDB version 28 (released March 30, 2016)  
644 were used to check for existence of a putative bipartite apicoplast targeting presequence using  
645 the artificial neural network predictor PATS [17].

646 Updated PlasmoAP-predicted apicoplast proteins were identified using the PlasmoDB  
647 version 32 proteome (released April 19, 2017) by first checking for the presequence of a  
648 predicted signal peptide using the neural network version of SignalP version 3.0 [76], and were

649 considered positive if they had a *D*-score above the default cutoff. The SignalP *C*-score was used  
650 to predict the signal peptide cleavage position, and the remaining portion of the protein was  
651 inspected for presence of a putative apicoplast transit peptide using the rules described for  
652 PlasmoAP [18], implemented in a Perl script.

653 *P. falciparum* proteins predicted to localize to the apicoplast by ApicoAP were accessed  
654 from the original paper [19]. Genes predicted to encode pseudogenes were excluded.

655 A positive control list of 96 high-confidence apicoplast proteins (S2 Table) was generated  
656 based on either (1) published localization of that protein in *Plasmodium* parasites or *Toxoplasma*  
657 *gondii* or (2) presence of that protein in either the isoprenoid biosynthesis or fatty acid  
658 biosynthesis/utilization pathways. To generate a negative control list of potential false positives,  
659 nuclear-encoded proteins (excluding pseudogenes) predicted to contain a signal peptide were  
660 identified as above and 451 of these proteins were designated as negative controls based on GO  
661 terms, annotations, and the published literature.

662

### 663 **Feature extraction for neural network**

664 To generate the positive training set for PlastNN, we took the combined list of previously known  
665 apicoplast proteins (S2 Table) and apicoplast proteins identified by BioID (S1 Table) and  
666 removed proteins that (1) were likely false positives based on our negative control list (S2 Table)  
667 or published localization data; (2) were likely targeted to the apicoplast without the canonical  
668 bipartite *N*-terminal leader sequence; or (3) did not contain a predicted signal peptide based on  
669 the SignalP 3.0 *D*-score. This yielded a final positive training set of 205 proteins (S4 Table). The  
670 negative training set was the previously generated list of known non-apicoplast proteins (S2

671 Table). The test set for PlastNN consisted of 450 proteins predicted to have a signal peptide by  
672 the SignalP 3.0 *D*-score that were not in the positive or negative training sets.

673 For each protein in our training and test sets, we took the 50 amino acids immediately  
674 after the end of the predicted signal peptide (according to the SignalP 3.0 *C*-score) and calculated  
675 the frequency of each of the 20 amino acids in this sequence. The length of 50 amino acids was  
676 chosen empirically by trying lengths from 20-100; highest accuracy was obtained using 50.  
677 Scaled FPKM values at 8 time points during intraerythrocytic development were obtained from  
678 published RNA-Seq [39]. By combining the amino acid frequencies with the 8 transcriptome  
679 values, we represented each protein in our training and test sets by a feature vector of length 28.

680

### 681 **Neural network training and cross-validation**

682 To train the model, the 205 positive and 451 negative training examples were combined and  
683 randomly shuffled. The training set was divided into 6 equal folds, each containing 109 or 110  
684 examples. We trained models using 6-fold cross-validation; that is, we trained 6 separate models  
685 with the same architecture, each using 5 of the 6 folds for training and then using the one  
686 remaining fold as a cross-validation set to evaluate performance. Accuracy, sensitivity,  
687 specificity, NPV, and PPV are calculated on this cross-validation set. The final reported values  
688 of accuracy, sensitivity, specificity, NPV, and PPV are the average and standard deviation over  
689 all 6 models. When predicting on the test set, the final predictions are generated by a majority  
690 vote of all 6 models.

691 Neural networks were trained using the RMSProp optimization algorithm with a learning  
692 rate of 0.0001. Tensorflow version 1.4.1 was used to build and train the neural network. Logistic

693 regression on the same dataset was carried out using the caret package (version 6.0-77) in R  
694 version 3.3.3.

695

## 696 **Analyses of Apicoplast Proteome Datasets**

697 The BioID apicoplast proteome and the predicted proteomes from PATS, PlasmoAP, ApicoAP,  
698 and PlastNN were analyzed according to the following formulae:

699 
$$\text{Accuracy} = (\text{TP} + \text{TN}) / (\text{TP} + \text{FP} + \text{TN} + \text{FN})$$

700 
$$\text{Sensitivity} = \text{TP} / (\text{TP} + \text{FN})$$

701 
$$\text{Specificity} = \text{TN} / (\text{TN} + \text{FP})$$

702 
$$\text{Negative Predictive Value (NPV)} = \text{TN} / (\text{TN} + \text{FN})$$

703 
$$\text{Positive Predictive Value (PPV)} = \text{TP} / (\text{TP} + \text{FP})$$

704 Abbreviations: TP, true positive; TN, true negative; FP, false positive; FN, false negative.

705 Because none of the 451 negative control proteins from the original list (S2 Table) were  
706 identified in our 187-protein BioID proteome, we manually inspected the BioID list, identified 5  
707 likely false positives, and added these to the negative control list for the purposes of analyses  
708 presented in Fig 2 and S2 Fig.

709

## 710 **Protein Novelty Analysis**

711 Proteins in the apicoplast proteome were manually categorized for having a potentially novel  
712 function based on PlasmoDB version 33 (released June 30, 2017) gene product annotations.

713 Gene products with annotations that could clearly assign a given protein to an established  
714 cellular pathway were labeled as “Known Pathway;” gene products with a descriptive annotation  
715 that did not clearly suggest a cellular pathway were labeled as “Annotated Gene Product,



716 Unknown Function;” and gene products that explicitly contained the words “unknown function”  
717 were labeled as “Unknown Function.”

718

### 719 **OrthoMCL Orthology Analysis**

720 To analyze the conservation of candidate apicoplast proteins identified by apicoplast BioID,  
721 OrthoMCL ortholog group IDs were obtained from PlasmoDB. Based on OrthoMCL version 5  
722 (released July 23, 2015), each ortholog group was then categorized as being present only in  
723 *Plasmodium* spp., only in Apicomplexa, or present in at least one organism outside of the  
724 Apicomplexa.

725

### 726 **Gene Essentiality Analysis**

727 Genome-scale essentiality data for *P. berghei* or *P. falciparum* genes were accessed from the  
728 original manuscripts [41, 42].

729

### 730 **Selection of Candidates for Experimental Localization**

731 To facilitate molecular cloning, proteins identified by BioID or PlastNN were candidates for  
732 GFP tagging only if their corresponding gene sizes were less than 2 kb. With the exception of  
733 ROM7, which was selected based on the biological interest of rhomboid proteases, we focused  
734 on localizing conserved *Plasmodium* genes of unknown function due to interest in functional  
735 characterization of the *Plasmodium* genome. PF3D7\_1472800, PF3D7\_0521400, and  
736 PF3D7\_0721100 (all from the BioID list) were chosen due to their diverse apicoplast:ER  
737 enrichment rankings in the BioID list (S1 Table; PF3D7\_1472800 ranked number 52/187 and  
738 was identified exclusively in BioID-Ap samples; PF3D7\_0521400 ranked number 131/187 and

739 was found in both samples but was enriched nearly 400-fold in BioID-Ap samples; and  
740 PF3D7\_0721100 ranked 184/187 and was enriched in BioID-Ap samples only slightly above our  
741 5-fold cutoff). From the PlastNN list, PF3D7\_1349900 and PF3D7\_1330100 were selected  
742 solely based on being proteins of unknown function with small gene sizes. Because of the small  
743 sample sizes of proteins selected for GFP-tagging and the non-random nature of selecting  
744 candidates, we note that the results of our experimental validation should not be extrapolated to  
745 be representative of the PPVs of the BioID and PlastNN datasets as a whole.

746

#### 747 **Parasite Growth Time Courses**

748 Sorbitol-synchronized ABCB7 and ABCF1 TetR-DOZI parasites were washed multiple times to  
749 remove residual ATc and were returned to culture medium containing 500 nM ATc, 200  $\mu$ M IPP  
750 (Isoprenoids, LLC), or no supplements. Samples for growth assays, DNA isolation, or western  
751 blotting were harvested every other day when the majority of parasites were trophozoites and  
752 schizonts. For growth assays, parasites were fixed in 1% paraformaldehyde in PBS and were  
753 stored at 4°C until completion of the time course. Samples were then stained with 50 nM  
754 YOYO-1 and parasitemia was analyzed on a BD Accuri C6 flow cytometer. Samples for DNA  
755 isolation and western blotting were treated with 0.1% saponin in PBS to release parasites from  
756 the erythrocyte, washed in PBS, and stored at -80°C until analysis.

757

#### 758 **Quantitative PCR**

759 Total parasite DNA was isolated from time course samples using the DNeasy Blood & Tissue  
760 Kit (Qiagen). Quantitative PCR was performed using Power SYBR Green PCR Master Mix  
761 (Thermo Fisher) with primers CHT1 F and CHT1 R targeting the nuclear gene chitinase or TufA

762 F and TufA R targeting the apicoplast gene elongation factor Tu (0.15  $\mu$ M final concentration  
763 each primer) [46]. Quantitative PCR was performed on an Applied Biosystems 7900HT Real-  
764 Time PCR System with the following thermocycling conditions: Initial denaturation 95°C/10  
765 minutes; 35 cycles of 95°C/1 minute, 56°C/1 minute; 65°C/1 minute; final extension 65°C/10  
766 minutes. Relative quantification of each target was performed using the  $\Delta\Delta C_t$  method.

767

## 768 **Statistics**

769 95% confidence intervals were determined using the GraphPad QuickCalc for confidence  
770 interval of a proportion via the modified Wald method  
771 (<https://www.graphpad.com/quickcalcs/confInterval1/>). Two-way ANOVAs were performed in  
772 GraphPad Prism version 7.04.

773

## 774 **Acknowledgements**

775 We thank Jacquin Niles for providing the NF54<sup>Cas9+T7 Polymerase</sup> cell line and pSN054-V5 plasmid,  
776 Sean Prigge for  $\alpha$ -PfACP antibody, Sebastian Mikolajczak and Stefan Kappe for  $\alpha$ -PfBiP  
777 antibody, and Walid Houry for  $\alpha$ -PfClpP antibody. We also thank Julian Lutze for assistance  
778 with molecular cloning of candidate apicoplast genes.

779

## 780 **Author Contributions**

781 Conceptualization, M.J.B. and E.Y.; Software, A.L., S.J.W., A.J., S.Z., X.W., J.Z. and S.A.R.;  
782 Investigation, M.J.B., and S.G.; Resources, L.Z., J.E.E., and S.A.R.; Writing – Original Draft,  
783 M.J.B. and E.Y.; Writing – Review & Editing, M.J.B., S.G., L.Z., A.L., S.W.J., A.J., S.Z., X.W.,

784 S.A.R., J.Z., J.E.E., and E.Y.; Supervision, E.Y., J.E.E., and J.Z.; Funding Acquisition, E.Y.,

785 J.E.E., J.Z., and S.A.R.

786

787 **Figures and Legends**

788

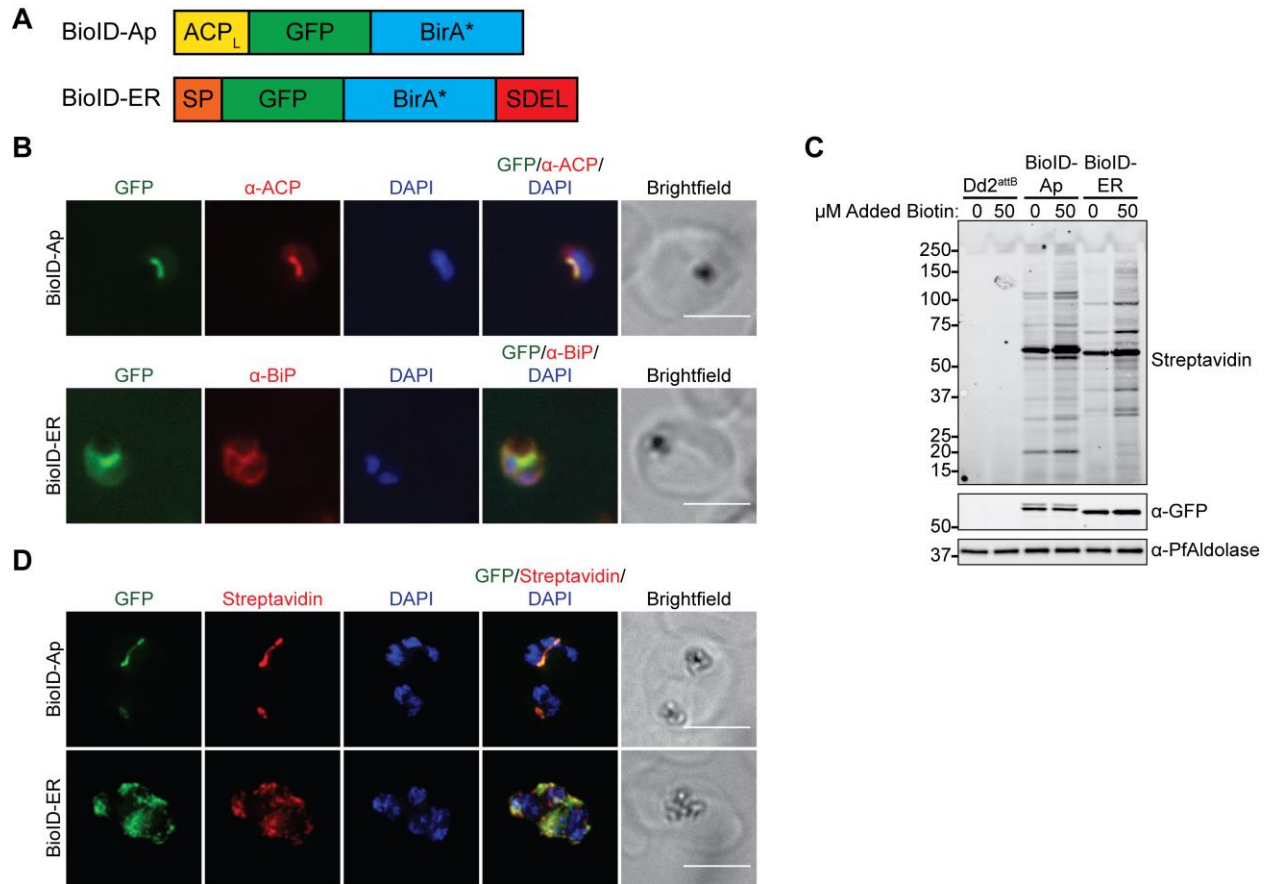

789

790 **Fig 1. The promiscuous biotin ligase BirA\* biotinylates proteins in the *P. falciparum***  
 791 **apicoplast and ER.** (A) Schematic (not to scale) of constructs for apicoplast- and ER-targeting  
 792 of GFP-BirA\*. ACP<sub>L</sub>, ACP leader sequence; SP, signal peptide; SDEL, ER-retention motif. (B)  
 793 Fixed-cell imaging of BioID-Ap and BioID-ER parasites stained with antibodies raised against  
 794 the apicoplast marker ACP or the ER marker BiP, respectively. Scale bars, 5 μm. (C) Western  
 795 blot of untreated and biotin-labeled Dd2<sup>attB</sup>, BioID-Ap, and BioID-ER parasites. (D) Fixed-cell  
 796 imaging of biotinylated proteins in biotin-labeled BioID-Ap and BioID-ER parasites. Scale bars,  
 797 5 μm.

798

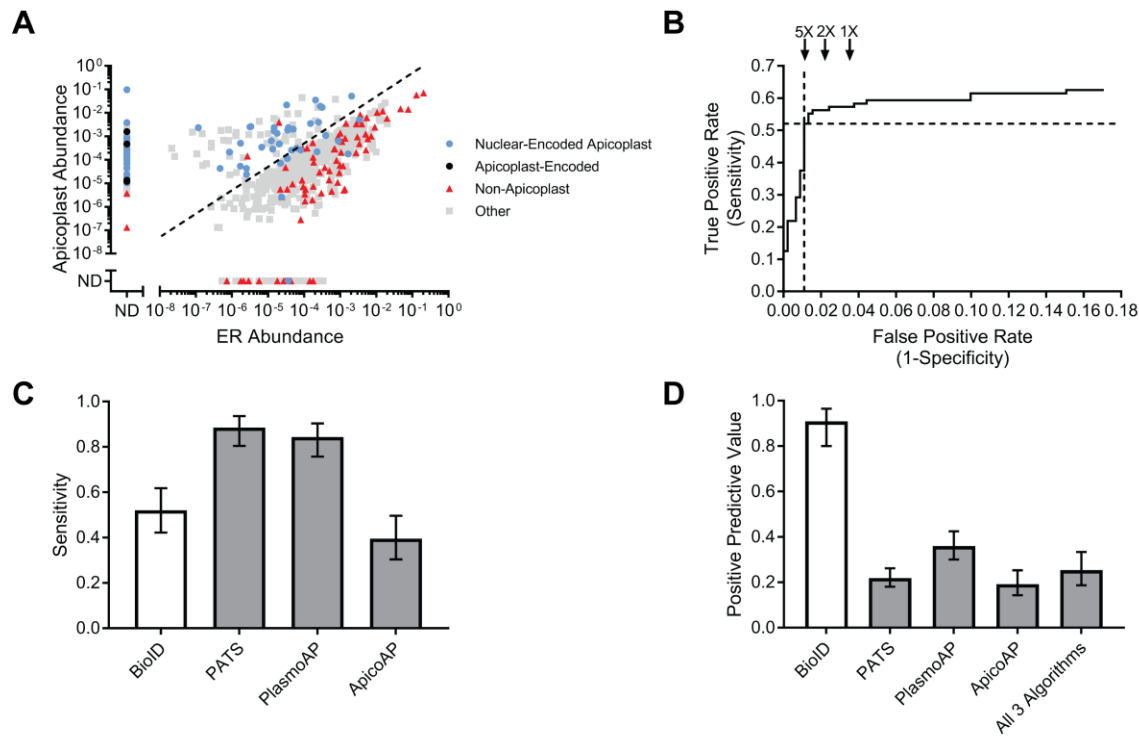

799

800 **Fig 2. Accurate, unbiased identification of apicoplast proteins using BioID.** (A) Abundances

801 of 728 proteins identified by mass spectrometry in BioID-Ap and BioID-ER parasites. Protein  
802 abundances were calculated by summing the total MS1 area of all matched peptides for a given  
803 protein and normalized by the total summed intensity of all *P. falciparum* peptides matched.

804 Dotted line represents 5-fold apicoplast:ER enrichment. ND, not detected. (B) ROC curve used  
805 to identify the apicoplast:ER enrichment that maximized true positives while minimizing false  
806 positives. Dotted lines denote the sensitivity and false positive rate of the 5-fold cutoff used.

807 False positive rates for hypothetical 2-fold and 1-fold enrichments are shown for reference. (C)

808 Sensitivities of BioID, PATS, PlasmoAP, and ApicoAP based on identification of 96 known

809 apicoplast proteins. (D) PPV of BioID, PATS, PlasmoAP, ApicoAP, and a dataset consisting of

810 proteins predicted to localize to the apicoplast by all three bioinformatic algorithms. Calculated

811 as the number of true positives divided by the total number of true positives and false positives.

812 Error bars in (C) and (D) represent 95% confidence intervals.

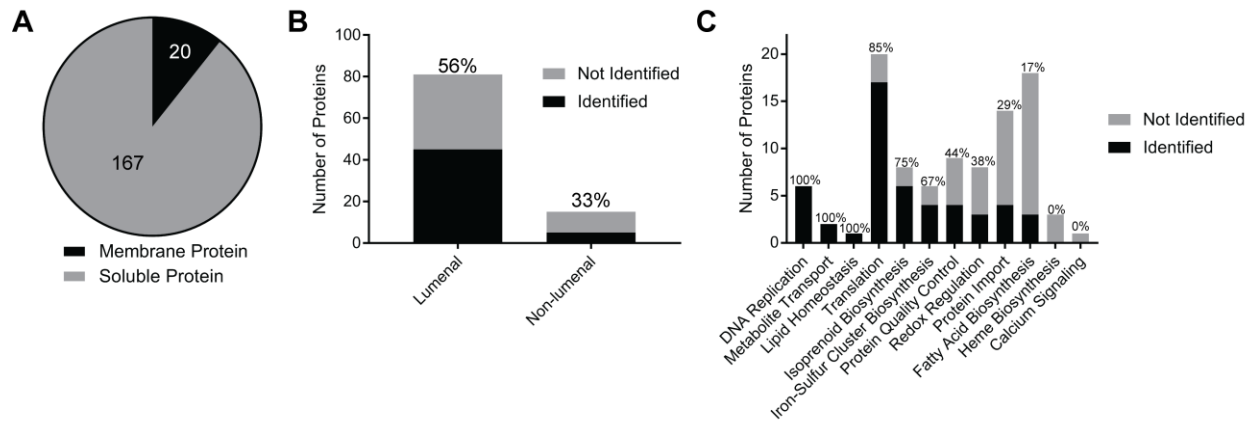

813

814 **Fig 3. Diversity of protein labeling by apicoplast BioID.** (A) Fraction of proteins identified by

815 apicoplast BioID that are predicted to localize to a membrane. Proteins were considered

816 “membrane” if they had at least one transmembrane domain annotated in PlasmoDB ending >80

817 amino acids from the annotated *N*-terminus. (B) Number of luminal and non-luminal positive

818 controls identified. Percentages above bars indicate the percentage of known proteins from each

819 category identified. (C) Number of proteins from established apicoplast pathways identified.

820 Percentages above bars indicate the percentage of known proteins from each pathway identified.

821

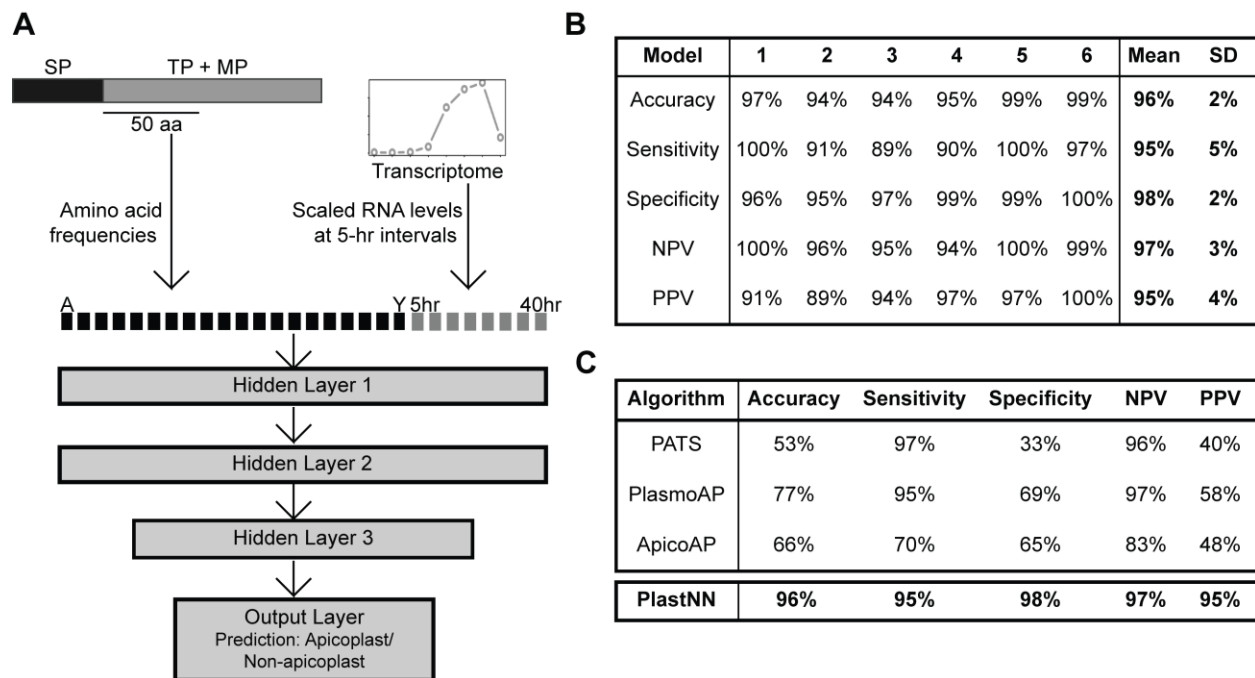

822

823 **Fig 4. Improved prediction of apicoplast proteins using the PlastNN algorithm. (A)**

824 Schematic of the PlastNN algorithm. For each signal peptide-containing protein, a region of 50

825 amino acids immediately following the signal peptide cleavage site was selected and the

826 frequencies of the 20 canonical amino acids in this region were calculated, resulting in a vector

827 of length 20. Scaled RNA levels of the gene encoding the protein at 8 time points were added,

828 resulting in a 28-dimensional vector representing each protein. This was used as input to train a

829 neural network with 3 hidden layers, resulting in a prediction of whether the protein is targeted to

830 the apicoplast or not. (B) Table showing the performance of the 6 models in PlastNN. Each

831 model was trained on 5/6th of the training set and cross-validated on the remaining 1/6th. Values

832 shown are accuracy, sensitivity, specificity, NPV, and PPV on the cross-validation set. The final

833 values reported are the average and standard deviation over all 6 models. (C) Comparison of

834 accuracy, sensitivity, specificity, NPV, and PPV for three previous algorithms and PlastNN.

835



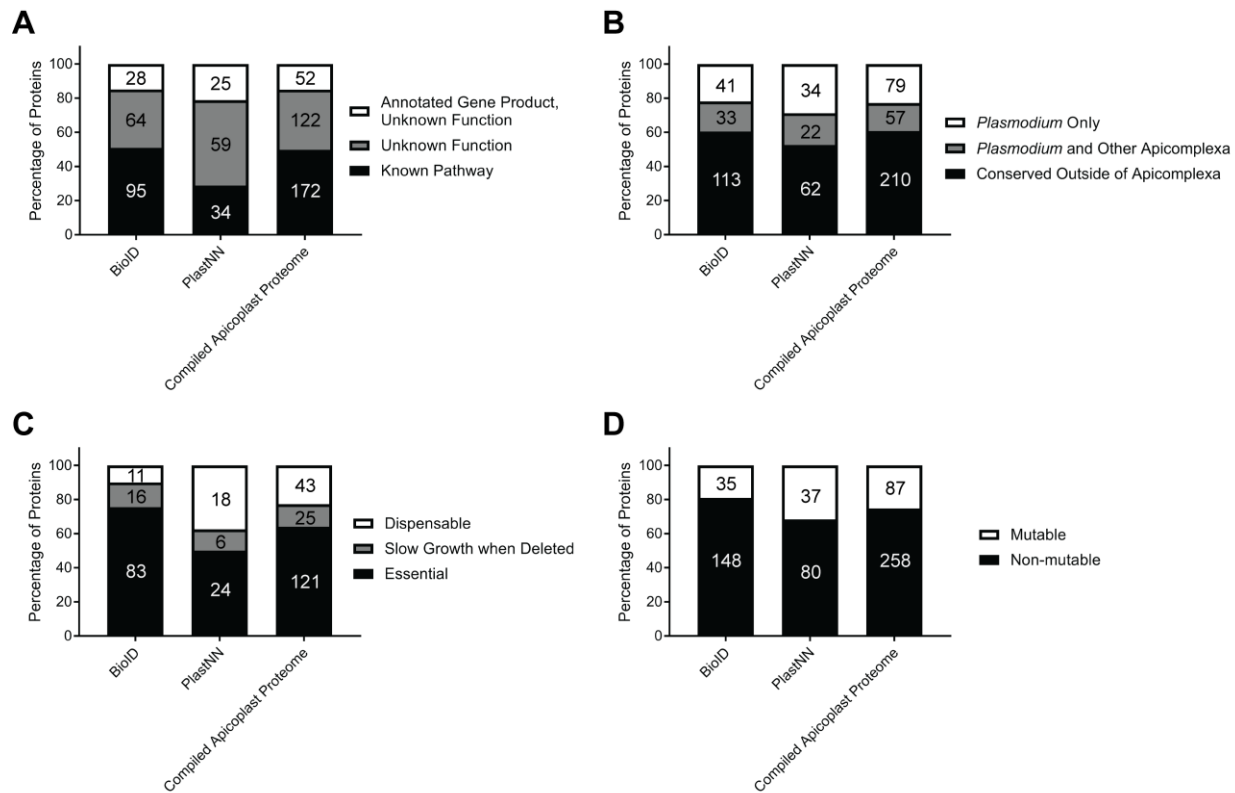

836

837 **Fig 5. Apicoplast BioID identifies novel and essential proteins.** (A) Percentage of proteins  
 838 identified that have 1) annotated gene products but unknown function, 2) gene products  
 839 annotated explicitly with “unknown function,” or 3) annotated gene products and function in a  
 840 known cellular pathway. (B) Percentage of proteins identified that are *Plasmodium*- or  
 841 Apicomplexa-specific based on OrthoMCL orthology analysis. (C) Percentage of proteins  
 842 identified that are essential, cause slow growth when deleted, or are dispensable based on  
 843 PlasmogEM essentiality data of *P. berghei* orthologs [41]. (D) Percentage of proteins identified  
 844 that were classified as mutable or non-mutable based on genome-scale transposon mutagenesis in  
 845 *P. falciparum* [42]. In each panel, absolute numbers of proteins are indicated within bars.

846

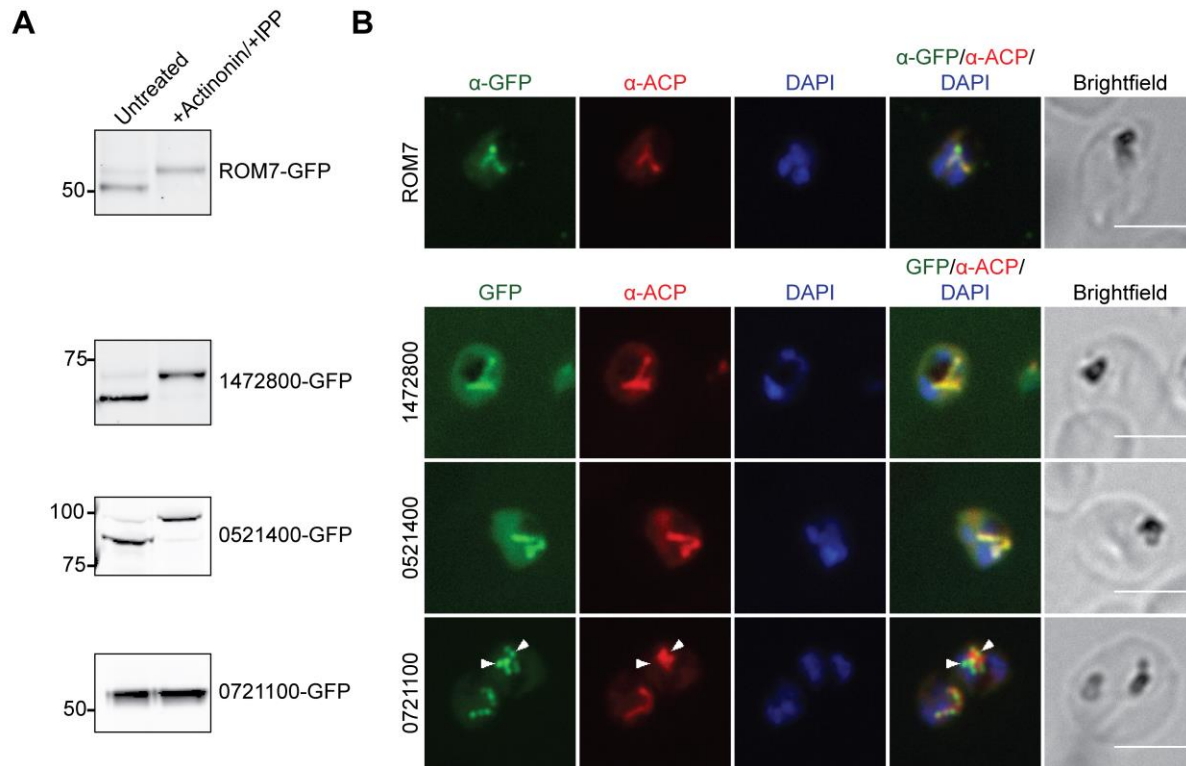

847

848 **Fig 6. Localization of candidate apicoplast proteins identified by BioID.** (A) Transit peptide

849 processing assay for C-terminally GFP-tagged candidates. Ring-stage parasites were either

850 untreated or treated with 10  $\mu$ M actinonin/200  $\mu$ M IPP for 3 days and protein processing was

851 assessed by western blot. (B) Fixed-cell imaging of GFP-tagged candidates in parasites stained

852 with an antibody raised against the apicoplast marker ACP. ROM7-GFP-expressing parasites

853 were also stained with anti-GFP antibody due to low signal from intrinsic GFP fluorescence in

854 fixed cells. Arrowheads indicate regions where PF3D7\_0721100-GFP puncta appear adjacent to

855 as opposed to co-localizing with ACP. Scale bars, 5  $\mu$ m.

856

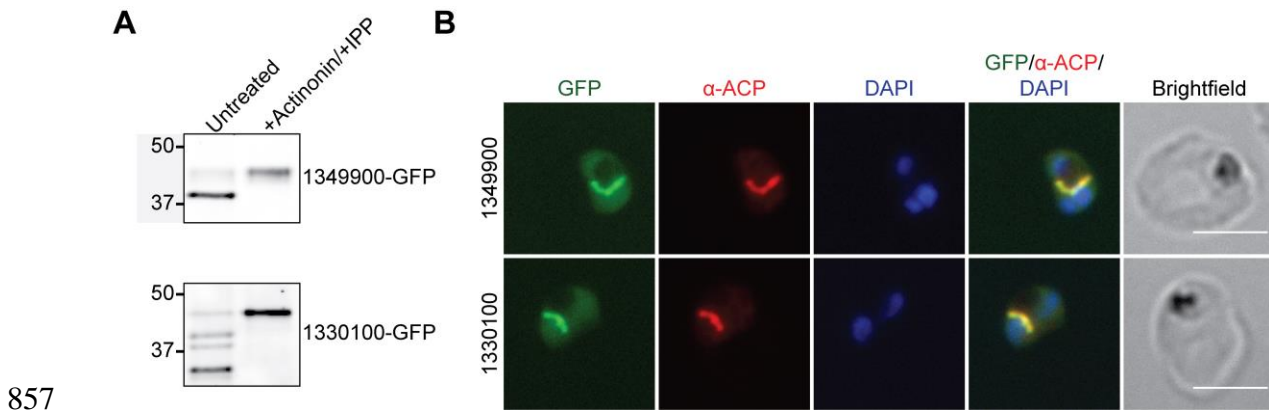

857

858 **Fig 7. Localization of candidate apicoplast proteins identified by PlastNN.** (A) Transit  
859 peptide processing assay for C-terminally GFP-tagged candidates. Ring-stage parasites were  
860 either untreated or treated with 10  $\mu$ M actinonin/200  $\mu$ M IPP for 3 days and protein processing  
861 was assessed by western blot. (B) Fixed-cell imaging of GFP-tagged candidates in parasites  
862 stained with an antibody raised against the apicoplast marker ACP. Scale bars, 5  $\mu$ m.

863

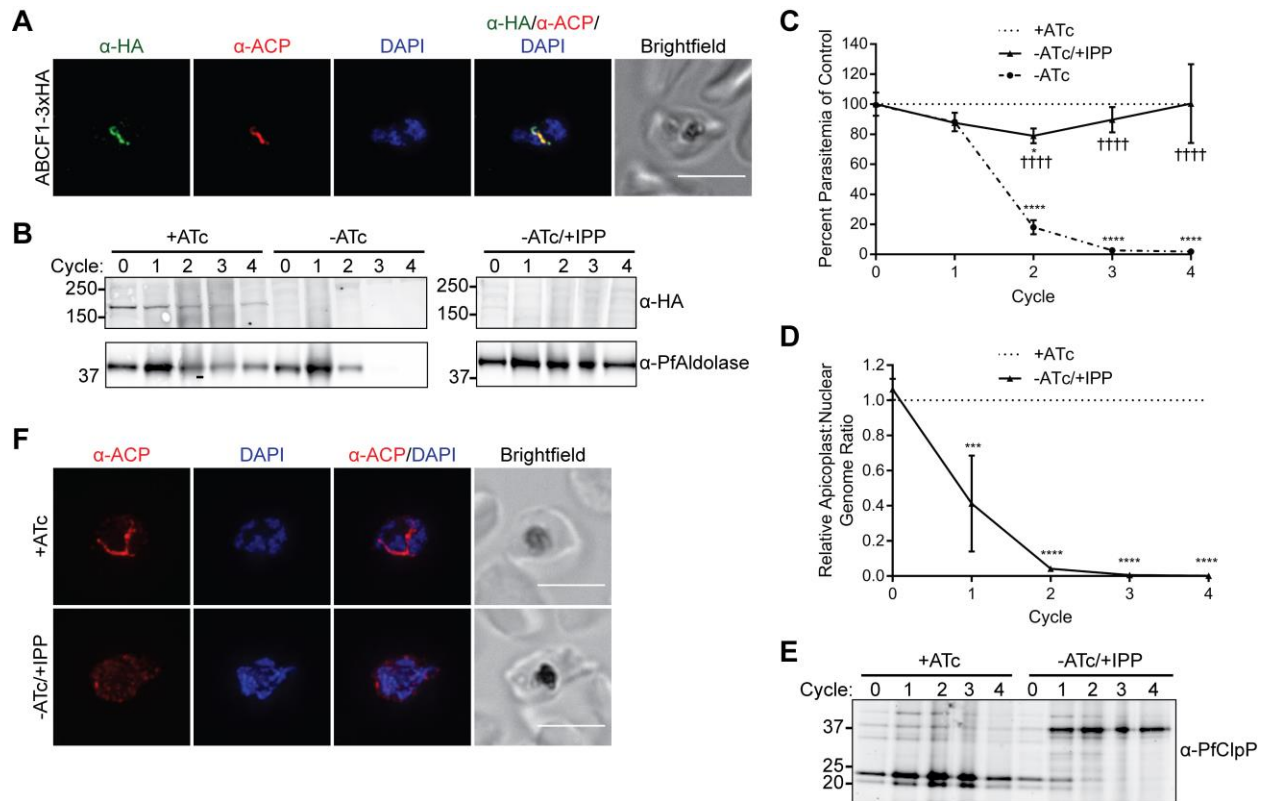

864

865 **Fig 8. ABCF1 is an essential apicoplast protein required for organelle biogenesis.** (A) Fixed-

866 cell imaging of ABCF1-3xHA knockdown parasites stained with antibodies raised against the

867 HA tag and the apicoplast marker ACP. Scale bar, 5  $\mu$ m. (B-F) ABCF1-3xHA knockdown

868 parasites were grown in the presence of ATc (+ATc), the absence of ATc (-ATc), or the absence

869 of ATc with IPP supplementation (-ATc/+IPP) for 4 growth cycles. (B) Western blot of ABCF1-

870 3xHA expression. (C) Parasite growth. At each time point, data are normalized to the untreated

871 (+ATc) control. Error bars represent standard deviation from the mean of two biological

872 replicates. \* $P < 0.05$ , \*\*\*\* $P < 0.0001$  compared to untreated control, †††† $P < 0.0001$  compared

873 to -ATc condition, repeated measures two-way ANOVA with Tukey's multiple comparisons test.

874 (D) Apicoplast:nuclear genome ratio. At each time point, data are normalized to the untreated

875 (+ATc) control. Error bars represent standard deviation from the mean of two biological

876 replicates, each performed in technical triplicate. \*\*\* $P < 0.001$ , \*\*\*\* $P < 0.0001$ , repeated

877 measures two-way ANOVA with Sidak's multiple comparisons test. (E) Western blot of ClpP  
878 processing. (F) Fixed-cell imaging showing ACP localization after 2 cycles of knockdown. Scale  
879 bars, 5  $\mu$ m.  
880

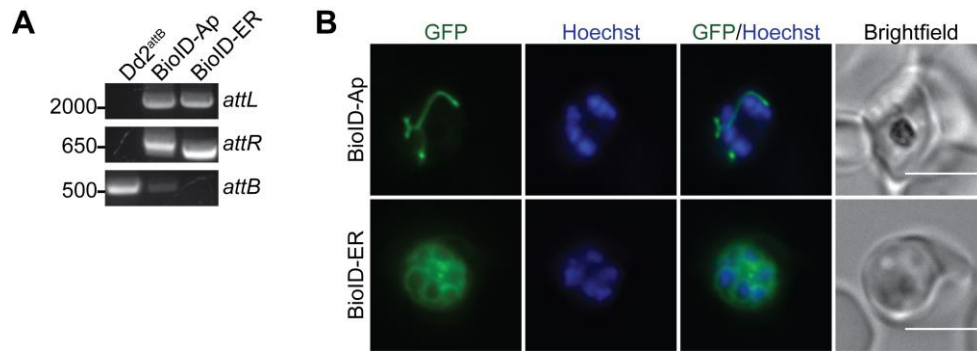

881

882 **S1 Fig. Integration and expression of BioID-Ap and BioID-ER constructs in Dd2<sup>attB</sup>**

883 **parasites.** (A) PCR products showing integrated *attL* and *attR* sites or unintegrated *attB* site. (B)

884 Live-cell imaging of Hoechst-stained BioID-Ap and BioID-ER parasites. Scale bars, 5  $\mu$ m.

885

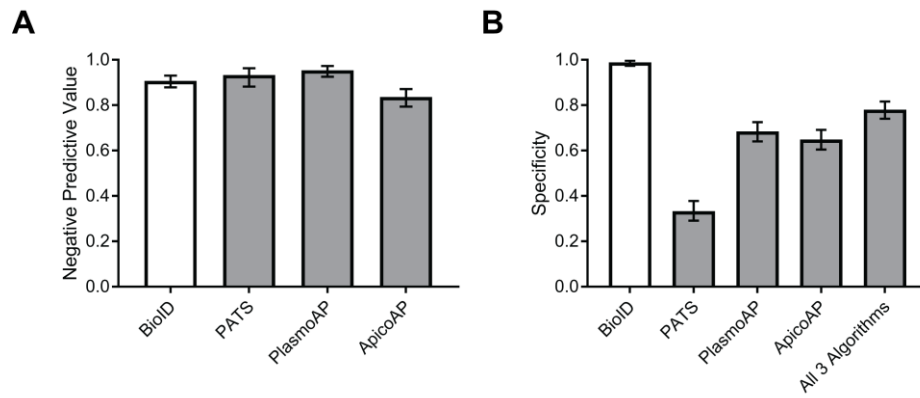

886

887 **S2 Fig. Comparison of negative predictive values and specificities of apicoplast BioID and**

888 **bioinformatic prediction algorithms. (A) Negative predictive value (NPV) and (B) specificity**

889 of apicoplast BioID, PATS, PlasmAP, and ApicoAP. Error bars represent 95% confidence

890 intervals.

891

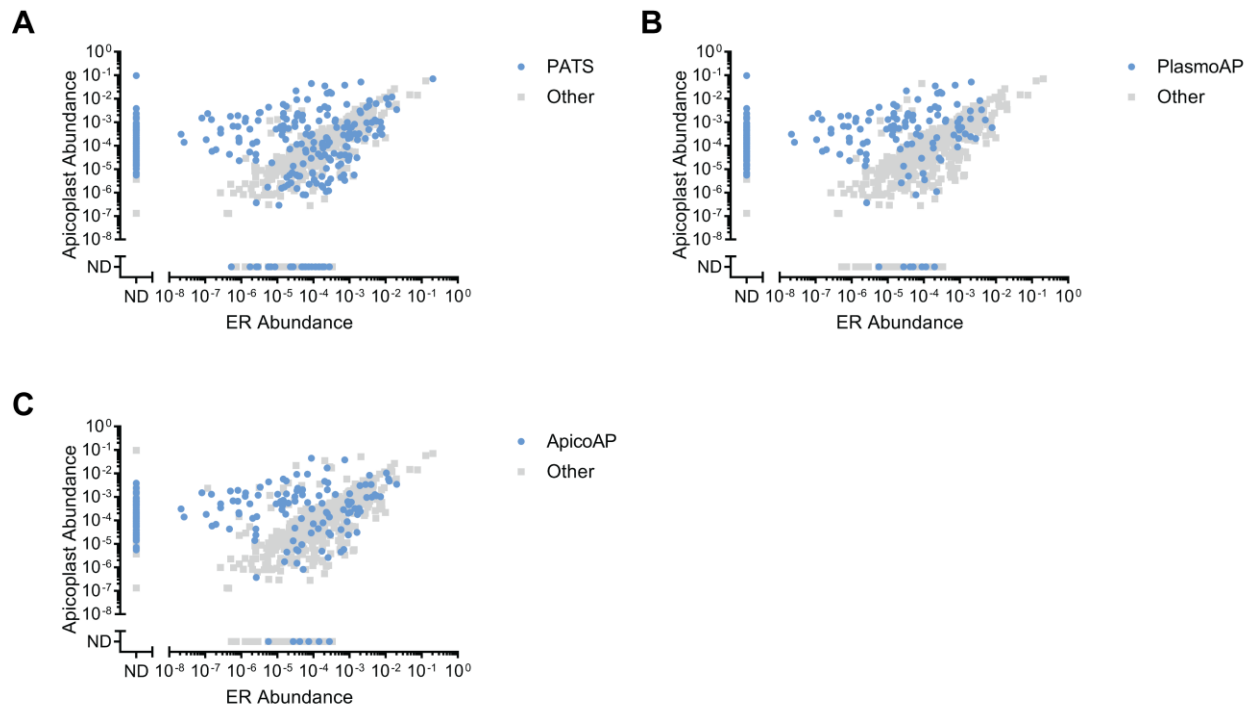

892

893 **S3 Fig. Bioinformatically predicted apicoplast proteins are not clearly distinguishable**

894 **based on apicoplast:ER abundance ratio.** Proteins predicted to localize to the apicoplast by

895 (A) PATS, (B) PlasmAP, or (C) ApicoAP are highlighted in each graph. Data points are

896 identical to those in Fig 2A.

897



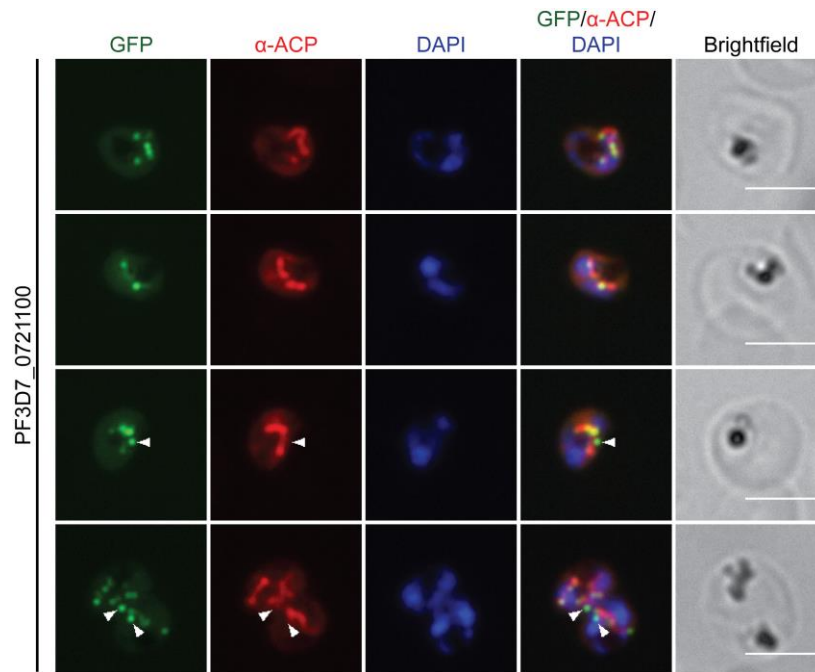

898

899 **S4 Fig. Additional fixed-cell images of PF3D7\_0721100-GFP localization.** PF3D7\_0721100-

900 GFP parasites were stained with an antibody against the apicoplast marker ACP. Arrowheads

901 indicate regions where PF3D7\_0721100-GFP puncta appear adjacent to as opposed to co-

902 localizing with ACP. Scale bars, 5  $\mu$ m.

903

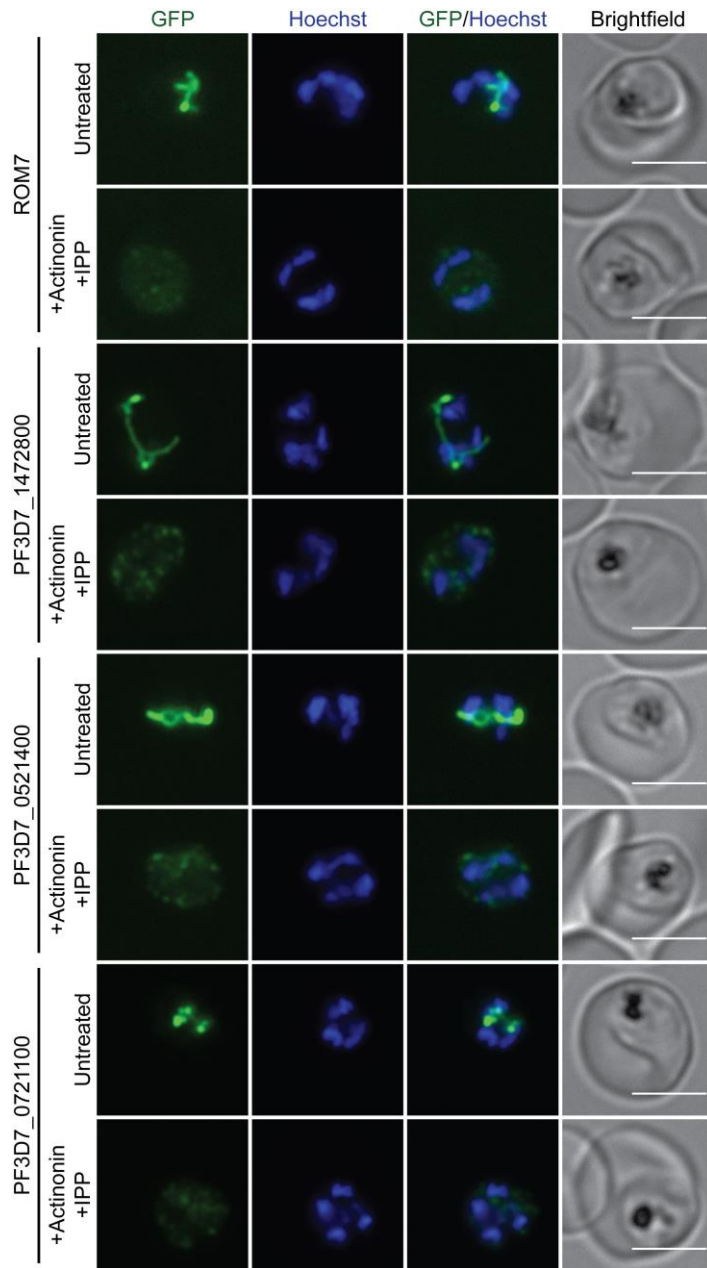

904

905 **S5 Fig. Live-cell imaging of candidate apicoplast proteins identified by BioID.** Parasites  
906 expressing C-terminally GFP-tagged candidate proteins from apicoplast BioID were either  
907 untreated (apicoplast-intact) or treated with 10  $\mu$ M actinonin/200  $\mu$ M IPP (apicoplast-disrupted)  
908 for 3 days prior to imaging. Scale bars, 5  $\mu$ m.

909

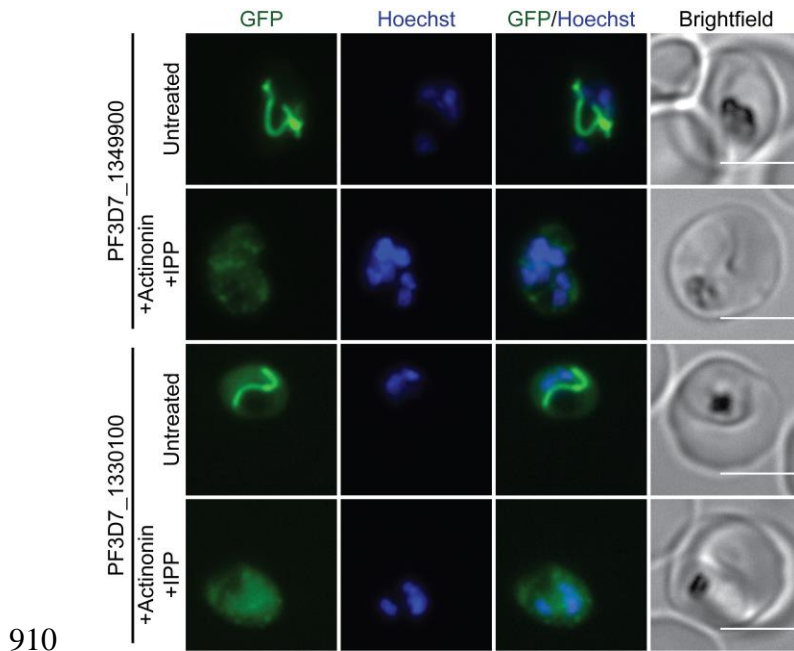

910

911 **S6 Fig. Live-cell imaging of candidate apicoplast proteins identified by PlastNN.** Parasites

912 expressing C-terminally GFP-tagged candidate proteins from PlastNN were either untreated

913 (apicoplast-intact) or treated with 10  $\mu$ M actinonin/200  $\mu$ M IPP (apicoplast-disrupted) for 3 days

914 prior to imaging. Scale bars, 5  $\mu$ m.

915

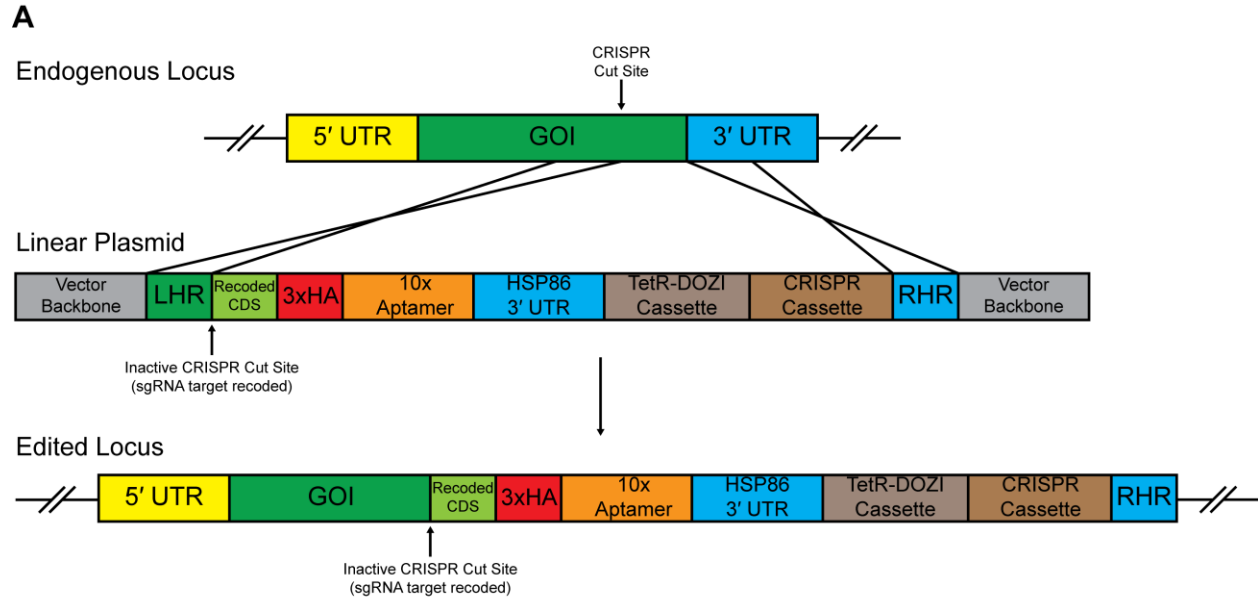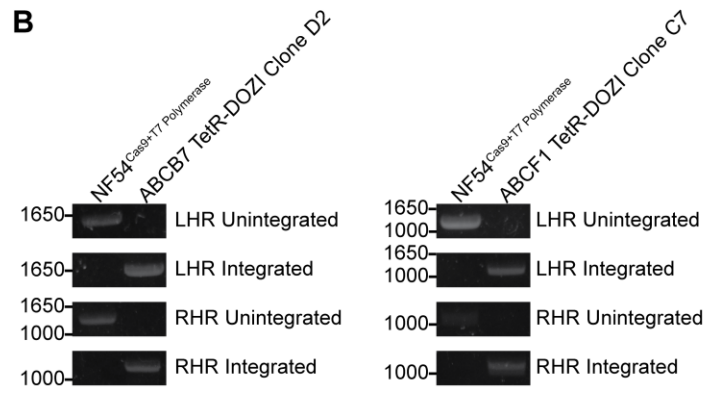

916

917 **S7 Fig. Generation of ABCB7 and ABCF1 TetR-DOZI conditional knockdown cell lines.**

918 (A) Schematic of CRISPR-Cas9-based endogenous editing to generate conditional knockdown

919 cell lines. GOI, gene of interest; LHR, left homology region; RHR, right homology region. (B)

920 PCR products showing integrated or unintegrated LHR and RHR sites in parental NF54<sup>Cas9+T7</sup>

921 Polymerase or clonal genome-edited parasites.

922

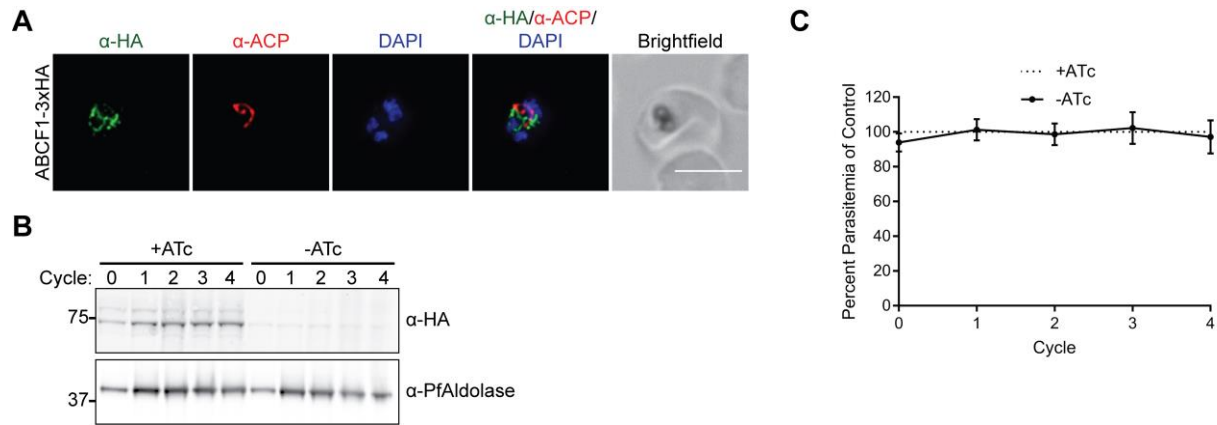

923

924 **S8 Fig. ABCB7 is a probable non-apicoplast protein for which knockdown does not cause**

925 **growth inhibition.** (A) Fixed-cell imaging of ABCB7-3xHA knockdown parasites stained with

926 antibodies raised against the HA tag and the apicoplast marker ACP. Scale bar, 5  $\mu$ m. (B-C)

927 ABCB7-3xHA knockdown parasites were grown in the presence of ATc (+ATc) or the absence

928 of ATc (-ATc) for 4 growth cycles. (B) Western blot of ABCB7-3xHA expression. (C) Parasite

929 growth. At each time point, data are normalized to the untreated (+ATc) control. Error bars

930 represent standard deviation from the mean of two biological replicates.

931

- 932 **S1 Table.** Abundances of 728 *P. falciparum* proteins identified by mass spectrometry in  $\geq 2$   
933 biological replicates and with  $\geq 2$  unique peptides in at least one mass spectrometry run.
- 934 **S2 Table.** Positive and negative control apicoplast proteins used in this study.
- 935 **S3 Table.** Proteins predicted to localize to the apicoplast by PATS, PlasmoAP, and ApicoAP.
- 936 **S4 Table.** Positive training set used to develop PlastNN.
- 937 **S5 Table.** Layer dimensions for PlastNN neural network.
- 938 **S6 Table.** Performance of different models in cross-validation.
- 939 **S7 Table.** Results of PlastNN prediction algorithm.
- 940 **S8 Table.** Compiled list of 346 candidate apicoplast proteins based on localization in the  
941 published literature, BioID, and PlastNN.
- 942 **S9 Table.** Summary of BioID and PlastNN candidate localization data from this study and  
943 Sayers et al.
- 944 **S10 Table.** Primer and gBlock sequences used in this study.
- 945 **S1 Data.** Spreadsheet containing numerical data for Figs 2A, 2B, 2C, 2D, 3A, 3B, 3C, 5A, 5B,  
946 5C, 5D, 8C, 8D, S2A, S2B, S7C.

947

## 948 **References**

949

- 950 1. Aurrecochea C, Barreto A, Basenko EY, Brestelli J, Brunk BP, Cade S, et al. EuPathDB: the  
951 eukaryotic pathogen genomics database resource. *Nucleic Acids Res.* 2017;45(D1):D581-91.  
952 doi: 10.1093/nar/gkw1105. PMID: 27903906; PMCID: PMC5210576.
- 953 2. McFadden GI, Reith ME, Munholland J, Lang-Unnasch N. Plastid in human parasites. *Nature.*  
954 1996;381(6582):482. doi: 10.1038/381482a0. PMID: 8632819.
- 955 3. Kohler S, Delwiche CF, Denny PW, Tilney LG, Webster P, Wilson RJ, et al. A plastid of  
956 probable green algal origin in Apicomplexan parasites. *Science.* 1997;275(5305):1485-9. PMID:  
957 9045615.

960

- 961 4. van Dooren GG, Striepen B. The algal past and parasite present of the apicoplast. *Annu Rev*  
962 *Microbiol.* 2013;67:271-89. doi: 10.1146/annurev-micro-092412-155741. PMID: 23808340.  
963
- 964 5. Spork S, Hiss JA, Mandel K, Sommer M, Kooij TW, Chu T, et al. An unusual ERAD-like  
965 complex is targeted to the apicoplast of *Plasmodium falciparum*. *Eukaryot Cell.* 2009;8(8):1134-  
966 45. doi: 10.1128/ec.00083-09. PMID: 19502583; PMCID: PMC2725561.  
967
- 968 6. Kalanon M, Tonkin CJ, McFadden GI. Characterization of two putative protein translocation  
969 components in the apicoplast of *Plasmodium falciparum*. *Eukaryot Cell.* 2009;8(8):1146-54. doi:  
970 10.1128/ec.00061-09. PMID: 19502580; PMCID: PMC2725556.  
971
- 972 7. Agrawal S, van Dooren GG, Beatty WL, Striepen B. Genetic evidence that an endosymbiont-  
973 derived endoplasmic reticulum-associated protein degradation (ERAD) system functions in  
974 import of apicoplast proteins. *J Biol Chem.* 2009;284(48):33683-91. doi:  
975 10.1074/jbc.M109.044024. PMID: 19808683; PMCID: PMC2785210.  
976
- 977 8. Agrawal S, Chung DW, Ponts N, van Dooren GG, Prudhomme J, Brooks CF, et al. An  
978 apicoplast localized ubiquitylation system is required for the import of nuclear-encoded plastid  
979 proteins. *PLOS Pathog.* 2013;9(6):e1003426. doi: 10.1371/journal.ppat.1003426. PMID:  
980 23785288; PMCID: PMC3681736.  
981
- 982 9. Ralph SA, van Dooren GG, Waller RF, Crawford MJ, Fraunholz MJ, Foth BJ, et al. Tropical  
983 infectious diseases: metabolic maps and functions of the *Plasmodium falciparum* apicoplast. *Nat*  
984 *Rev Microbiol.* 2004;2(3):203-16. doi: 10.1038/nrmicro843. PMID: 15083156.  
985
- 986 10. Sheiner L, Vaidya AB, McFadden GI. The metabolic roles of the endosymbiotic organelles  
987 of *Toxoplasma* and *Plasmodium* spp. *Curr Opin Microbiol.* 2013;16(4):452-8. doi:  
988 10.1016/j.mib.2013.07.003. PMID: 23927894; PMCID: PMC3767399.  
989
- 990 11. Jomaa H, Wiesner J, Sanderbrand S, Altincicek B, Weidemeyer C, Hintz M, et al. Inhibitors  
991 of the nonmevalonate pathway of isoprenoid biosynthesis as antimalarial drugs. *Science.*  
992 1999;285(5433):1573-6. PMID: 10477522.  
993
- 994 12. Dahl EL, Shock JL, Shenai BR, Gut J, DeRisi JL, Rosenthal PJ. Tetracyclines specifically  
995 target the apicoplast of the malaria parasite *Plasmodium falciparum*. *Antimicrob Agents*  
996 *Chemother.* 2006;50(9):3124-31. doi: 10.1128/aac.00394-06. PMID: 16940111; PMCID:  
997 PMC1563505.  
998
- 999 13. Dahl EL, Rosenthal PJ. Multiple antibiotics exert delayed effects against the *Plasmodium*  
1000 *falciparum* apicoplast. *Antimicrob Agents Chemother.* 2007;51(10):3485-90. doi:  
1001 10.1128/aac.00527-07. PMID: 17698630; PMCID: PMC2043295.  
1002
- 1003 14. Goodman CD, Su V, McFadden GI. The effects of anti-bacterials on the malaria parasite  
1004 *Plasmodium falciparum*. *Mol Biochem Parasitol.* 2007;152(2):181-91. doi:  
1005 10.1016/j.molbiopara.2007.01.005. PMID: 17289168.  
1006

- 1007 15. Stanway RR, Witt T, Zobiak B, Aepfelbacher M, Heussler VT. GFP-targeting allows  
1008 visualization of the apicoplast throughout the life cycle of live malaria parasites. *Biol Cell*.  
1009 2009;101(7):415-30. doi: 10.1042/bc20080202. PMID: 19143588.  
1010
- 1011 16. Amberg-Johnson K, Hari SB, Ganesan SM, Lorenzi HA, Sauer RT, Niles JC, et al. Small  
1012 molecule inhibition of apicomplexan FtsH1 disrupts plastid biogenesis in human pathogens.  
1013 *eLife*. 2017;6:e29865. doi: 10.7554/eLife.29865. PMID: 28826494; PMCID: PMC5576918.  
1014
- 1015 17. Zuegge J, Ralph S, Schmuker M, McFadden GI, Schneider G. Deciphering apicoplast  
1016 targeting signals--feature extraction from nuclear-encoded precursors of *Plasmodium falciparum*  
1017 apicoplast proteins. *Gene*. 2001;280(1-2):19-26. PMID: 11738814.  
1018
- 1019 18. Foth BJ, Ralph SA, Tonkin CJ, Struck NS, Fraunholz M, Roos DS, et al. Dissecting  
1020 apicoplast targeting in the malaria parasite *Plasmodium falciparum*. *Science*.  
1021 2003;299(5607):705-8. doi: 10.1126/science.1078599. PMID: 12560551.  
1022
- 1023 19. Cilingir G, Broschat SL, Lau AO. ApicoAP: the first computational model for identifying  
1024 apicoplast-targeted proteins in multiple species of Apicomplexa. *PLOS ONE*. 2012;7(5):e36598.  
1025 doi: 10.1371/journal.pone.0036598. PMID: 22574192; PMCID: PMC3344922.  
1026
- 1027 20. Roux KJ, Kim DI, Raida M, Burke B. A promiscuous biotin ligase fusion protein identifies  
1028 proximal and interacting proteins in mammalian cells. *J Cell Biol*. 2012;196(6):801-10. doi:  
1029 10.1083/jcb.201112098. PMID: 22412018; PMCID: PMC3308701.  
1030
- 1031 21. Rhee HW, Zou P, Udeshi ND, Martell JD, Mootha VK, Carr SA, et al. Proteomic mapping of  
1032 mitochondria in living cells via spatially restricted enzymatic tagging. *Science*.  
1033 2013;339(6125):1328-31. doi: 10.1126/science.1230593. PMID: 23371551; PMCID:  
1034 PMC3916822.  
1035
- 1036 22. Morriswood B, Havlicek K, Demmel L, Yavuz S, Sealey-Cardona M, Vidilaseris K, et al.  
1037 Novel bilobe components in *Trypanosoma brucei* identified using proximity-dependent  
1038 biotinylation. *Eukaryot Cell*. 2013;12(2):356-67. doi: 10.1128/ec.00326-12. PMID: 23264645;  
1039 PMCID: PMC3571296.  
1040
- 1041 23. Chen AL, Kim EW, Toh JY, Vashisht AA, Rashoff AQ, Van C, et al. Novel components of  
1042 the *Toxoplasma* inner membrane complex revealed by BioID. *mBio*. 2015;6(1):e02357-14. doi:  
1043 10.1128/mBio.02357-14. PMID: 25691595; PMCID: PMC4337574.  
1044
- 1045 24. Nadipuram SM, Kim EW, Vashisht AA, Lin AH, Bell HN, Coppens I, et al. *In vivo*  
1046 biotinylation of the *Toxoplasma* parasitophorous vacuole reveals novel dense granule proteins  
1047 important for parasite growth and pathogenesis. *mBio*. 2016;7(4):e00808-16. doi:  
1048 10.1128/mBio.00808-16. PMID: 27486190; PMCID: PMC4981711.  
1049
- 1050 25. Dang HQ, Zhou Q, Rowlett VW, Hu H, Lee KJ, Margolin W, et al. Proximity interactions  
1051 among basal body components in *Trypanosoma brucei* identify novel regulators of basal body



- 1052 biogenesis and inheritance. *mBio*. 2017;8(1):e02120-16. doi: 10.1128/mBio.02120-16. PMID:  
1053 28049148; PMCID: PMC5210500.  
1054
- 1055 26. Chen AL, Moon AS, Bell HN, Huang AS, Vashisht AA, Toh JY, et al. Novel insights into  
1056 the composition and function of the *Toxoplasma* IMC sutures. *Cell Microbiol*.  
1057 2017;19(4):e12678. doi: 10.1111/cmi.12678. PMID: 27696623; PMCID: PMC5909696.  
1058
- 1059 27. Kehrer J, Frischknecht F, Mair GR. Proteomic analysis of the *Plasmodium berghei*  
1060 gametocyte egressome and vesicular bioID of osmiophilic body proteins identifies merozoite  
1061 TRAP-like protein (MTRAP) as an essential factor for parasite transmission. *Mol Cell*  
1062 *Proteomics*. 2016;15(9):2852-62. doi: 10.1074/mcp.M116.058263. PMID: 27371728; PMCID:  
1063 PMC5013303.  
1064
- 1065 28. Khosh-Naucke M, Becker J, Mesen-Ramirez P, Kiani P, Birnbaum J, Frohlike U, et al.  
1066 Identification of novel parasitophorous vacuole proteins in *P. falciparum* parasites using BioID.  
1067 *Int J Med Microbiol*. 2018;308(1):13-24. doi: 10.1016/j.ijmm.2017.07.007. PMID: 28784333.  
1068
- 1069 29. Schnider CB, Bausch-Fluck D, Bruhlmann F, Heussler VT, Burda PC. BioID reveals novel  
1070 proteins of the *Plasmodium* parasitophorous vacuole membrane. *mSphere*. 2018;3(1):e00522-17.  
1071 doi: 10.1128/mSphere.00522-17. PMID: 29404413; PMCID: PMC5784244.  
1072
- 1073 30. Waller RF, Reed MB, Cowman AF, McFadden GI. Protein trafficking to the plastid of  
1074 *Plasmodium falciparum* is via the secretory pathway. *EMBO J*. 2000;19(8):1794-802. doi:  
1075 10.1093/emboj/19.8.1794. PMID: 10775264; PMCID: PMC302007.  
1076
- 1077 31. Nkrumah LJ, Muhle RA, Moura PA, Ghosh P, Hatfull GF, Jacobs WR, Jr., et al. Efficient  
1078 site-specific integration in *Plasmodium falciparum* chromosomes mediated by  
1079 mycobacteriophage Bxb1 integrase. *Nat Methods*. 2006;3(8):615-21. doi: 10.1038/nmeth904.  
1080 PMID: 16862136; PMCID: PMC2943413.  
1081
- 1082 32. Yu M, Kumar TR, Nkrumah LJ, Coppi A, Retzlaff S, Li CD, et al. The fatty acid  
1083 biosynthesis enzyme FabI plays a key role in the development of liver-stage malarial parasites.  
1084 *Cell Host Microbe*. 2008;4(6):567-78. doi: 10.1016/j.chom.2008.11.001. PMID: 19064257;  
1085 PMCID: PMC2646117.  
1086
- 1087 33. Vaughan AM, O'Neill MT, Tarun AS, Camargo N, Phuong TM, Aly AS, et al. Type II fatty  
1088 acid synthesis is essential only for malaria parasite late liver stage development. *Cell Microbiol*.  
1089 2009;11(3):506-20. doi: 10.1111/j.1462-5822.2008.01270.x. PMID: 19068099; PMCID:  
1090 PMC2688669.  
1091
- 1092 34. Pei Y, Tarun AS, Vaughan AM, Herman RW, Soliman JM, Erickson-Wayman A, et al.  
1093 *Plasmodium* pyruvate dehydrogenase activity is only essential for the parasite's progression from  
1094 liver infection to blood infection. *Mol Microbiol*. 2010;75(4):957-71. doi: 10.1111/j.1365-  
1095 2958.2009.07034.x. PMID: 20487290.  
1096

- 1097 35. Nagaraj VA, Sundaram B, Varadarajan NM, Subramani PA, Kalappa DM, Ghosh SK, et al.  
1098 Malaria parasite-synthesized heme is essential in the mosquito and liver stages and complements  
1099 host heme in the blood stages of infection. *PLOS Pathog.* 2013;9(8):e1003522. doi:  
1100 10.1371/journal.ppat.1003522. PMID: 23935500; PMCID: PMC3731253.  
1101
- 1102 36. Ke H, Sigala PA, Miura K, Morrissey JM, Mather MW, Crowley JR, et al. The heme  
1103 biosynthesis pathway is essential for *Plasmodium falciparum* development in mosquito stage but  
1104 not in blood stages. *J Biol Chem.* 2014;289(50):34827-37. doi: 10.1074/jbc.M114.615831.  
1105 PMID: 25352601; PMCID: PMC4263882.  
1106
- 1107 37. Bozdech Z, Llinas M, Pulliam BL, Wong ED, Zhu J, DeRisi JL. The transcriptome of the  
1108 intraerythrocytic developmental cycle of *Plasmodium falciparum*. *PLOS Biol.* 2003;1(1):E5. doi:  
1109 10.1371/journal.pbio.0000005. PMID: 12929205; PMCID: PMC176545.  
1110
- 1111 38. Sheiner L, Demerly JL, Poulsen N, Beatty WL, Lucas O, Behnke MS, et al. A systematic  
1112 screen to discover and analyze apicoplast proteins identifies a conserved and essential protein  
1113 import factor. *PLOS Pathog.* 2011;7(12):e1002392. doi: 10.1371/journal.ppat.1002392. PMID:  
1114 22144892; PMCID: PMC3228799.  
1115
- 1116 39. Bartfai R, Hoeijmakers WA, Salcedo-Amaya AM, Smits AH, Janssen-Megens E, Kaan A, et  
1117 al. H2A.Z demarcates intergenic regions of the *Plasmodium falciparum* epigenome that are  
1118 dynamically marked by H3K9ac and H3K4me3. *PLOS Pathog.* 2010;6(12):e1001223. doi:  
1119 10.1371/journal.ppat.1001223. PMID: 21187892; PMCID: PMC3002978.  
1120
- 1121 40. Chen F, Mackey AJ, Stoeckert CJ, Jr., Roos DS. OrthoMCL-DB: querying a comprehensive  
1122 multi-species collection of ortholog groups. *Nucleic Acids Res.* 2006;34(Database issue):D363-  
1123 8. doi: 10.1093/nar/gkj123. PMID: 16381887; PMCID: PMC1347485.  
1124
- 1125 41. Bushell E, Gomes AR, Sanderson T, Anar B, Girling G, Herd C, et al. Functional profiling of  
1126 a *Plasmodium* genome reveals an abundance of essential genes. *Cell.* 2017;170(2):260-72.e8.  
1127 doi: 10.1016/j.cell.2017.06.030. PMID: 28708996; PMCID: PMC5509546.  
1128
- 1129 42. Zhang M, Wang C, Otto TD, Oberstaller J, Liao X, Adapa SR, et al. Uncovering the essential  
1130 genes of the human malaria parasite *Plasmodium falciparum* by saturation mutagenesis. *Science.*  
1131 2018;360(6388):eaap7847. doi: 10.1126/science.aap7847. PMID: 29724925.  
1132
- 1133 43. Sayers CP, Mollard V, Buchanan HD, McFadden GI, Goodman CD. A genetic screen in  
1134 rodent malaria parasites identifies five new apicoplast putative membrane transporters, one of  
1135 which is essential in human malaria parasites. *Cell Microbiol.* 2018;20(1):e12789. doi:  
1136 10.1111/cmi.12789. PMID: 28902970.  
1137
- 1138 44. Waller RF, Keeling PJ, Donald RG, Striepen B, Handman E, Lang-Unnasch N, et al.  
1139 Nuclear-encoded proteins target to the plastid in *Toxoplasma gondii* and *Plasmodium*  
1140 *falciparum*. *Proc Natl Acad Sci U S A.* 1998;95(21):12352-7. PMID: 9770490; PMCID:  
1141 PMC22835.  
1142

- 1143 45. van Dooren GG, Su V, D’Ombrain MC, McFadden GI. Processing of an apicoplast leader  
1144 sequence in *Plasmodium falciparum* and the identification of a putative leader cleavage enzyme.  
1145 J Biol Chem. 2002;277(26):23612-9. doi: 10.1074/jbc.M201748200. PMID: 11976331.  
1146
- 1147 46. Yeh E, DeRisi JL. Chemical rescue of malaria parasites lacking an apicoplast defines  
1148 organelle function in blood-stage *Plasmodium falciparum*. PLOS Biol. 2011;9(8):e1001138. doi:  
1149 10.1371/journal.pbio.1001138. PMID: 21912516; PMCID: PMC3166167.  
1150
- 1151 47. Kerr ID. Sequence analysis of twin ATP binding cassette proteins involved in translational  
1152 control, antibiotic resistance, and ribonuclease L inhibition. Biochem Biophys Res Commun.  
1153 2004;315(1):166-73. doi: 10.1016/j.bbrc.2004.01.044. PMID: 15013441.  
1154
- 1155 48. Dean M, Annilo T. Evolution of the ATP-binding cassette (ABC) transporter superfamily in  
1156 vertebrates. Annu Rev Genomics Hum Genetics. 2005;6:123-42. doi:  
1157 10.1146/annurev.genom.6.080604.162122. PMID: 16124856.  
1158
- 1159 49. Rijpma SR, van der Velden M, Annoura T, Matz JM, Kenthirapalan S, Kooij TW, et al. Vital  
1160 and dispensable roles of *Plasmodium* multidrug resistance transporters during blood- and  
1161 mosquito-stage development. Mol Microbiol. 2016;101(1):78-91. doi: 10.1111/mmi.13373.  
1162 PMID: 26991313.  
1163
- 1164 50. Goldfless SJ, Wagner JC, Niles JC. Versatile control of *Plasmodium falciparum* gene  
1165 expression with an inducible protein-RNA interaction. Nat Commun. 2014;5:5329. doi:  
1166 10.1038/ncomms6329. PMID: 25370483; PMCID: PMC4223869.  
1167
- 1168 51. Ganesan SM, Falla A, Goldfless SJ, Nasamu AS, Niles JC. Synthetic RNA-protein modules  
1169 integrated with native translation mechanisms to control gene expression in malaria parasites.  
1170 Nature Commun. 2016;7:10727. doi: 10.1038/ncomms10727. PMID: 26925876; PMCID:  
1171 PMC4773503.  
1172
- 1173 52. Wu W, Herrera Z, Ebert D, Baska K, Cho SH, DeRisi JL, et al. A chemical rescue screen  
1174 identifies a *Plasmodium falciparum* apicoplast inhibitor targeting MEP isoprenoid precursor  
1175 biosynthesis. Antimicrob Agents Chemother. 2015;59(1):356-64. doi: 10.1128/aac.03342-14.  
1176 PMID: 25367906; PMCID: PMC4291372.  
1177
- 1178 53. Mullin KA, Lim L, Ralph SA, Spurck TP, Handman E, McFadden GI. Membrane  
1179 transporters in the relict plastid of malaria parasites. Proc Natl Acad Sci U S A.  
1180 2006;103(25):9572-7. doi: 10.1073/pnas.0602293103. PMID: 16760253; PMCID:  
1181 PMC1480448.  
1182
- 1183 54. Parsons M, Karnataki A, Feagin JE, DeRocher A. Protein trafficking to the apicoplast:  
1184 deciphering the apicomplexan solution to secondary endosymbiosis. Eukaryot Cell.  
1185 2007;6(7):1081-8. doi: 10.1128/ec.00102-07. PMID: 17513565; PMCID: PMC1951102.  
1186

- 1187 55. Calvo SE, Mootha VK. The mitochondrial proteome and human disease. *Annu Rev*  
1188 *Genomics Hum Genetics*. 2010;11:25-44. doi: 10.1146/annurev-genom-082509-141720. PMID:  
1189 20690818; PMCID: PMC4397899.  
1190
- 1191 56. Calvo SE, Clauser KR, Mootha VK. MitoCarta2.0: an updated inventory of mammalian  
1192 mitochondrial proteins. *Nucleic Acids Res*. 2016;44(D1):D1251-7. doi: 10.1093/nar/gkv1003.  
1193 PMID: 26450961; PMCID: PMC4702768.  
1194
- 1195 57. Boel G, Smith PC, Ning W, Englander MT, Chen B, Hashem Y, et al. The ABC-F protein  
1196 EttA gates ribosome entry into the translation elongation cycle. *Nat Struct Mol Biol*.  
1197 2014;21(2):143-51. doi: 10.1038/nsmb.2740. PMID: 24389466; PMCID: PMC4101993.  
1198
- 1199 58. Chen B, Boel G, Hashem Y, Ning W, Fei J, Wang C, et al. EttA regulates translation by  
1200 binding the ribosomal E site and restricting ribosome-tRNA dynamics. *Nat Struct Mol Biol*.  
1201 2014;21(2):152-9. doi: 10.1038/nsmb.2741. PMID: 24389465; PMCID: PMC4143144.  
1202
- 1203 59. Vazquez de Aldana CR, Marton MJ, Hinnebusch AG. GCN20, a novel ATP binding cassette  
1204 protein, and GCN1 reside in a complex that mediates activation of the eIF-2 alpha kinase GCN2  
1205 in amino acid-starved cells. *EMBO J*. 1995;14(13):3184-99. PMID: 7621831; PMCID:  
1206 PMC394380.  
1207
- 1208 60. Marton MJ, Vazquez de Aldana CR, Qiu H, Chakraborty K, Hinnebusch AG. Evidence that  
1209 GCN1 and GCN20, translational regulators of *GCN4*, function on elongating ribosomes in  
1210 activation of eIF2alpha kinase GCN2. *Mol Cell Biol*. 1997;17(8):4474-89. PMID: 9234705;  
1211 PMCID: PMC232301.  
1212
- 1213 61. Tyzack JK, Wang X, Belsham GJ, Proud CG. ABC50 interacts with eukaryotic initiation  
1214 factor 2 and associates with the ribosome in an ATP-dependent manner. *J Biol Chem*.  
1215 2000;275(44):34131-9. doi: 10.1074/jbc.M002868200. PMID: 10931828.  
1216
- 1217 62. Paytubi S, Wang X, Lam YW, Izquierdo L, Hunter MJ, Jan E, et al. ABC50 promotes  
1218 translation initiation in mammalian cells. *J Biol Chem*. 2009;284(36):24061-73. doi:  
1219 10.1074/jbc.M109.031625. PMID: 19570978; PMCID: PMC2782000.  
1220
- 1221 63. Sibley LD. The roles of intramembrane proteases in protozoan parasites. *Biochim Biophys*  
1222 *Acta*. 2013;1828(12):2908-15. doi: 10.1016/j.bbame.2013.04.017. PMID: 24099008; PMCID:  
1223 PMC3793208.  
1224
- 1225 64. Dowse TJ, Soldati D. Rhomboid-like proteins in Apicomplexa: phylogeny and nomenclature.  
1226 *Trends Parasitol*. 2005;21(6):254-8. doi: 10.1016/j.pt.2005.04.009. PMID: 15922242.  
1227
- 1228 65. Lin JW, Meireles P, Prudencio M, Engelmann S, Annoura T, Sajid M, et al. Loss-of-function  
1229 analyses defines vital and redundant functions of the *Plasmodium* rhomboid protease family.  
1230 *Mol Microbiol*. 2013;88(2):318-38. doi: 10.1111/mmi.12187. PMID: 23490234.  
1231

- 1232 66. Lau JB, Stork S, Moog D, Schulz J, Maier UG. Protein-protein interactions indicate  
1233 composition of a 480 kDa SELMA complex in the second outermost membrane of diatom  
1234 complex plastids. *Mol Microbiol.* 2016;100(1):76-89. doi: 10.1111/mmi.13302. PMID:  
1235 26712034.
- 1236
- 1237 67. Sidik SM, Huet D, Ganesan SM, Huynh MH, Wang T, Nasamu AS, et al. A genome-wide  
1238 CRISPR screen in *Toxoplasma* identifies essential apicomplexan genes. *Cell.* 2016;166(6):1423-  
1239 35.e12. doi: 10.1016/j.cell.2016.08.019. PMID: 27594426; PMCID: PMC5017925.
- 1240
- 1241 68. Balabaskaran Nina P, Morrissey JM, Ganesan SM, Ke H, Pershing AM, Mather MW, et al.  
1242 ATP synthase complex of *Plasmodium falciparum*: dimeric assembly in mitochondrial  
1243 membranes and resistance to genetic disruption. *J Biol Chem.* 2011;286(48):41312-22. doi:  
1244 10.1074/jbc.M111.290973. PMID: 21984828; PMCID: PMC3308843.
- 1245
- 1246 69. Deitsch K, Driskill C, Wellems T. Transformation of malaria parasites by the spontaneous  
1247 uptake and expression of DNA from human erythrocytes. *Nucleic Acids Res.* 2001;29(3):850-3.  
1248 PMID: 11160909; PMCID: PMC30384.
- 1249
- 1250 70. Wagner JC, Platt RJ, Goldfless SJ, Zhang F, Niles JC. Efficient CRISPR-Cas9-mediated  
1251 genome editing in *Plasmodium falciparum*. *Nat Methods.* 2014;11(9):915-8. doi:  
1252 10.1038/nmeth.3063. PMID: 25108687.
- 1253
- 1254 71. El Bakkouri M, Pow A, Mulichak A, Cheung KL, Artz JD, Amani M, et al. The Clp  
1255 chaperones and proteases of the human malaria parasite *Plasmodium falciparum*. *J Mol Biol.*  
1256 2010;404(3):456-77. doi: 10.1016/j.jmb.2010.09.051. PMID: 20887733.
- 1257
- 1258 72. Tonkin CJ, van Dooren GG, Spurck TP, Struck NS, Good RT, Handman E, et al.  
1259 Localization of organellar proteins in *Plasmodium falciparum* using a novel set of transfection  
1260 vectors and a new immunofluorescence fixation method. *Mol Biochem Parasitol.*  
1261 2004;137(1):13-21. doi: 10.1016/j.molbiopara.2004.05.009. PMID: 15279947.
- 1262
- 1263 73. Gallagher JR, Prigge ST. *Plasmodium falciparum* acyl carrier protein crystal structures in  
1264 disulfide-linked and reduced states and their prevalence during blood stage growth. *Proteins.*  
1265 2010;78(3):575-88. doi: 10.1002/prot.22582. PMID: 19768685; PMCID: PMC2805782.
- 1266
- 1267 74. Elias JE, Gygi SP. Target-decoy search strategy for increased confidence in large-scale  
1268 protein identifications by mass spectrometry. *Nat Methods.* 2007;4(3):207-14. doi:  
1269 10.1038/nmeth1019. PMID: 17327847.
- 1270
- 1271 75. Huttlin EL, Jedrychowski MP, Elias JE, Goswami T, Rad R, Beausoleil SA, et al. A tissue-  
1272 specific atlas of mouse protein phosphorylation and expression. *Cell.* 2010;143(7):1174-89. doi:  
1273 10.1016/j.cell.2010.12.001. PMID: 21183079; PMCID: PMC3035969.
- 1274
- 1275 76. Bendtsen JD, Nielsen H, von Heijne G, Brunak S. Improved prediction of signal peptides:  
1276 SignalP 3.0. *J Mol Biol.* 2004;340(4):783-95. doi: 10.1016/j.jmb.2004.05.028. PMID: 15223320.
